## Shoot and root thermomorphogenesis are linked by a developmental trade-off

Christophe Gaillochet<sup>1\*</sup>, Yogev Burko<sup>1,3</sup>, Matthieu Pierre Platre<sup>1</sup>, Ling Zhang<sup>1</sup>, Jan Simura<sup>4</sup>, Vinod Kumar<sup>5</sup>, Karin Ljung<sup>4</sup>, Joanne Chory<sup>1,3</sup>, Wolfgang Busch<sup>1,2</sup>

<sup>1</sup> Plant Biology Laboratory, Salk Institute for Biological Studies, 10010 N Torrey Pines Rd, La Jolla, CA 92037, USA

<sup>2</sup> Integrative Biology Laboratory, Salk Institute for Biological Studies, 10010 N Torrey Pines Rd, La Jolla, CA 92037, USA.

<sup>3</sup> Howard Hughes Medical Institute, Salk Institute for Biological Studies, La Jolla, CA 92037, USA

<sup>4</sup> Umeå Plant Science Centre, Department of Forest Genetics and Plant Physiology, Swedish University of Agricultural Sciences, SE-901 83 Umeå, Sweden

<sup>5</sup> Department of Biosciences College of Life and Environmental Sciences, Stocker Road, Exeter EX4 4QD, United Kingdom

\* Present address: Center for Plant Systems Biology, VIB, 9052 Ghent, Belgium

Correspondence and requests for materials should be addressed to W.B. (email: [wbusch@salk.edu](mailto:wbusch@salk.edu))

## Abstract:

Temperature is one of the most impactful environmental factors to which plants adjust their growth and development. While the regulation of temperature signaling has been extensively investigated for the aerial part of plants, much less is known and understood about how roots sense and modulate their growth in response to fluctuating temperatures. Here we found that shoot and root growth responses to high ambient temperature are coordinated during early seedling development. A shoot signaling module that includes HY5, the phytochromes and the PIFs exerts a central function in coupling these growth responses and control auxin levels in the root. In addition to the HY5/PIF-dependent shoot module, a regulatory axis composed of auxin biosynthesis and auxin perception factors controls root responses to high ambient temperature. Together, our findings show that shoot and root developmental responses to temperature are tightly coupled during thermomorphogenesis and suggest that roots integrate energy signals with local hormonal inputs.

## 1 Introduction

2 Over the course of their life, plants are subjected to constant environmental fluctuations.  
3 Consequently, plants have evolved tremendous developmental plasticity that allows them to  
4 precisely adjust their development to environmental conditions and therefore to thrive in  
5 dynamically and often unpredictably changing environments. In particular, the early stage of  
6 seedling development constitutes a critical moment at which plants need to sense their  
7 environment and respond quickly to fine-tune their developmental programs and successfully  
8 establish themselves as autotrophic seedlings (reviewed in (Ha et al., 2017)). Not surprisingly,  
9 early life stages have been shown to strongly contribute to local adaptation (reviewed in  
10 (Donohue et al., 2010)).

11 Temperature is a pervasive environmental parameter influencing biological systems at all scales  
12 from the rate of biochemical reactions to the timing of developmental transitions (reviewed in  
13 (Penfield, 2008)). In addition, temperature shows important geographical, diurnal as well as  
14 seasonal variation. Importantly, plants are equipped with sophisticated molecular machineries to  
15 perceive temperature fluctuations, which allows them to sense and translate these signals into  
16 appropriate developmental responses. Accordingly, raising ambient temperature leads to  
17 increased elongation of the hypocotyl and root –a process called thermomorphogenesis  
18 (reviewed in (Quint et al., 2016)).

19 The molecular mechanisms underlying shoot thermo-responses have been largely investigated  
20 (Quint et al., 2016). In this context, the photoreceptor PHYTOCHROME B (PHYB) enables  
21 perception of higher ambient temperature by switching from an active to an inactive form (Legris  
22 et al., 2016). This process of phytochrome thermal reversion subsequently prevents  
23 sequestration and degradation of transcription factors such as the PHYTOCHROME  
24 INTERACTING FACTORS (PIFs) that can accumulate and promote the expression of  
25 downstream regulatory genes (Jung et al., 2016; Kumar et al., 2012; Park et al., 2018).

26 Among the PIF clade, PIF4 acts as a central signalling hub to mediate shoot  
27 thermomorphogenesis (Quint et al., 2016; Koini et al., 2009). Upon higher ambient temperature,  
28 PIF4 directly positively regulates the expression of a battery of genes including auxin  
29 biosynthetic genes *YUCCA8* (*YUC8*) and *TRYPTOPHAN AMINOTRANSFERASE OF*  
30 *ARABIDOPSIS1* (*TAA1*), thereby promoting an elevation of auxin levels and increased  
31 hypocotyl cell elongation (Franklin et al., 2011; Sun et al., 2012). This regulatory circuit also  
32 integrates inputs from the transcription factor LONG HYPOCOTYL5 (*HY5*) that can act  
33 antagonistically to PIF4 by repressing *PIF4* expression or by directly regulating key PIF4 target

34 genes including *YUC8* (Delker et al., 2014; Gangappa and Kumar, 2017). Both *HY5* and *PIF4*  
35 expression levels and protein abundance are tightly regulated by a plethora of factors (reviewed  
36 in (Lau and Deng, 2012; Quint et al., 2016)). Among those, *CONSTITUTIVE*  
37 *PHOTOMORPHOGENESIS PROTEIN1* (*COP1*) and *DEETIOLATED1* (*DET1*) trigger *HY5*  
38 degradation and promote both *PIF4* expression and protein stabilization (Gangappa and Kumar,  
39 2017; Osterlund et al., 2000; Saijo et al., 2003; Yanagawa et al., 2004). The collective genetic  
40 activity of *PIF4*, *HY5*, *COP1* and *DET1* defines an intertwined regulatory module that acts at the  
41 interface between light and temperature signalling (Delker et al., 2014; Gangappa and Kumar,  
42 2017). Interestingly, *HY5* protein has also been shown to translocate from the shoot to the root  
43 and to coordinate carbon fixation with nitrogen uptake (Chen et al., 2016).

44 Importantly, roots can autonomously sense and respond to temperature (Bellstaedt et al., 2019),  
45 which might allow them to reach deeper and cooler layers of the soil under warm surface  
46 conditions (Illston and Fiebrich, 2017). However, in contrast to the shoot, the molecular  
47 mechanisms underlying plant root thermo-responses have so far remained elusive. Similarly to  
48 the shoot, maintenance of auxin homeostasis is critical for the root response to temperature  
49 (Wang et al., 2016). In line with this idea, auxin signaling increases upon perception of higher  
50 ambient temperature (Hanzawa et al., 2013; Wang et al., 2016). In this context the auxin efflux  
51 transporters *PIN2* and *PILS6* mediate auxin transport and local accumulation at the root, which  
52 in turn triggers developmental response to temperature in the root (Feraru et al., 2019;  
53 Hanzawa et al., 2013). Furthermore, the auxin receptors *TIR1* and *AFB2* are stabilized upon  
54 increased ambient temperature by forming a protein complex with *HEAT SHOCK PROTEIN 90*  
55 (*HSP90*) and its co-chaperone *SUPPRESSOR OF G2 ALLELE SKP1* (*SGT1*). The  
56 accumulation of *TIR1* and *AFB2* subsequently activates auxin signaling and mediates root  
57 thermo-sensory elongation (Wang et al., 2016).

58 Although root and shoot thermomorphogenesis occur simultaneously during early seedling  
59 development (Bellstaedt et al., 2019), it is still unclear whether these responses are coordinated  
60 at the whole plant level. In this study, we leveraged a genetic approach combined with  
61 comprehensive phenotypic analyses, transcriptional profiling and metabolic measurements to  
62 further characterize the molecular circuits mediating root thermomorphogenesis. We found that  
63 a shoot regulatory module including *HY5*, phytochromes and *PIF* factors can also regulate the  
64 root growth response upon perception of higher ambient temperature, demonstrating that shoot  
65 and root growth responses are coupled during early seedling development. Furthermore, we  
66 show that an additional regulatory axis composed of auxin biosynthesis and perception genes is

67 required during root thermomorphogenesis and propose that the relative abundance of auxin  
68 and its downstream signaling activity in the shoot and in the root are critical to coordinately  
69 control growth response to temperature in these organs.

70

## 71 Results

72

### 73 HY5 controls the root thermo-response

74 The impact of increased temperature on plant development has been extensively investigated  
75 (reviewed in (Quint et al., 2016)), however it is still unclear whether a core regulatory network  
76 governs temperature sensing and signalling in multiple developmental contexts and whether  
77 these responses are coordinated across multiple organs. To assess how ambient temperature  
78 modulates root development, we grew plants at 21 degree Celsius (°C) and analyzed their  
79 growth until three days after transfer at either 21°C or 27°C. In line with previous reports (Feraru  
80 et al., 2019; Martins et al., 2017; Wang et al., 2016), wild type plants grown at 27°C displayed  
81 an increased primary root growth rate compared to plants kept at 21°C (Figure 1A,B). Having  
82 established this experimental set up to analyze root response to temperature shifts, we went on  
83 to further characterize the genetic mechanisms underlying this process.

84 The transcription factor HY5 is a key regulator of shoot thermomorphogenesis, while at the  
85 same time regulates root development and hormonal signaling pathways (reviewed in  
86 (Gangappa and Botto, 2016)). Thus, we hypothesized that HY5 could regulate the root  
87 response to increased ambient temperature. We analyzed the relative root growth rate of *hy5*  
88 mutant and wild type plants grown at 21°C and 27°C (Figure 1A-D) and in line with our  
89 hypothesis, four different allelic versions of *hy5* mutants displayed reduced root growth  
90 response to temperature compared to wild type. While wild type plants increased root growth by  
91 80 to 120%, *hy5* mutants displayed an increase of only 20 to 40% (Figure 1A-D). This reduced  
92 response was also observed under a different growth condition with reduced light intensity (see  
93 material and methods; source data file) as well as when roots were grown in the dark or on  
94 medium not supplemented with sucrose (Supplementary Figure 1A-C), indicating that the  
95 reduced response observed in *hy5* was not dependent on light or nutrient conditions. To test  
96 whether this reduced response was also associated with changes in root apical meristem (RAM)  
97 activity, we measured the dynamics of the root meristem size after temperature shift (Figure  
98 1E,F). Interestingly, *hy5* mutants displayed a lower relative RAM size at all time points analyzed  
99 –from 24 hours to 72 hours after temperature shift– indicating that their RAM was hypersensitive  
100 to increased ambient temperature compared to wild type plants. Together, these data  
101 demonstrate that *HY5* is required to mediate root responses to temperature.

102 While analyzing the root phenotypes of *hy5* mutants, we observed that plants with a lower root  
103 growth frequently displayed longer hypocotyls than plants with a higher root growth, suggesting  
104 that shoot and root responses to temperature could be functionally connected. To test this

105 observation, we simultaneously measured hypocotyl and root growth on individual plants and  
106 calculated the relative hypocotyl or root growth rate. Raising ambient temperature strongly  
107 promoted hypocotyl growth while decreasing root growth response in the *hy5* mutant  
108 (Supplementary Figure 1D), supporting the idea that these two processes could be coordinated  
109 during early seedling development.

110

#### 111 Phytochromes and PIF activity regulate the root response to higher ambient temperature

112 The phenotypic relation between hypocotyl and root growth response in the *hy5* mutant  
113 suggested that additional regulators of shoot thermomorphogenesis might also modulate the  
114 root growth response. Previous studies had demonstrated a critical role of PHYB to sense  
115 temperature in the shoot and to mediate hypocotyl growth (Jung et al., 2016; Legris et al.,  
116 2016), leading us to hypothesize that the phytochromes might also regulate root thermo-  
117 responses. Accordingly, both *phyA* and *phyB* single mutant plants displayed a reduction in the  
118 root response to temperature compared to wild type. This difference was further enhanced in  
119 *phyAB* double mutants, showing that PHYA and PHYB co-regulate this process (Figure 2A,B).  
120 The lower root growth rate in *phyAB* was also associated with a decreased relative root  
121 meristem size, demonstrating that root meristematic activity was hypersensitive to increased  
122 ambient temperature, similarly to what we observed in *hy5* mutant plants (Figure 2C,D).  
123 Collectively, these data demonstrate that in addition to their function in the shoot, the  
124 phytochromes are also required for root thermomorphogenesis.

125 Phytochromes mediate the phosphorylation of downstream factors including the PIFs, which are  
126 then targeted for degradation (Lorrain et al., 2008). As PIF4 functionally interacts with HY5  
127 during shoot thermomorphogenesis (Delker et al., 2014; Gangappa and Kumar, 2017), we  
128 reasoned that PIF4 might also modulate root responses to temperature downstream of the  
129 phytochromes. Thus, we tested whether PIF4 and other PIF family members could control root  
130 response to temperature. Similarly to previous studies (Martins et al., 2017), *pif4* mutants did  
131 not show an impaired root response (Figure 2E,F). Moreover, simultaneously interfering with the  
132 function of *PIF1*, *PIF3*, *PIF4* and *PIF5* in the *pifQ* mutant had no effect on the root response  
133 compared to wild type, indicating that the PIFs were not required to regulate this process  
134 (Figure 2E,F). Although the loss-of-function mutants did not display impaired root response to  
135 higher temperature, we reasoned that because phytochromes are negative regulators of PIFs,  
136 PIF activity might be increased in phytochrome mutants, and that in turn might contribute to the  
137 reduction of the root thermo-response in *phyAB* mutants. Thus, we next tested whether  
138 promoting PIF function could be sufficient to modulate root growth response. In line with this

139 idea, the gain-of-function *pPIF4:PIF4-FLAG* mutant line (PIF4OX; Gangappa and Kumar, 2017)  
140 showed a significant reduction in the root response to higher temperature (Figure 2G),  
141 demonstrating that while PIF4 function is not required, it is indeed sufficient to modulate the root  
142 response to temperature. As PIF activity is promoted in phytochrome mutants (Park et al., 2018,  
143 2004), our results further suggest that increased PIF4 activity in the *phyAB* could lead to a  
144 reduction of the root thermo-response.

145

#### 146 HY5-PIF activity co-regulate root thermomorphogenesis

147 Having shown that HY5 or phytochromes/PIF activity can modulate shoot and root responses to  
148 temperature, we next hypothesized that HY5 and PIFs could co-regulate this process. To test  
149 this idea, we first impaired HY5 function together with DET1 and COP1, which are regulators of  
150 *PIF4* expression and the hypocotyl response to temperature (Supplementary Figure 2A;  
151 Gangappa and Kumar, 2017)). In accordance with a previous report (Gangappa and Kumar,  
152 2017), both *hy5 det1* and *hy5 cop1* double mutants suppressed the enhanced hypocotyl  
153 response of *hy5* mutants (Figure 3A,B). Interestingly, these lines also displayed a significant  
154 increase in root growth temperature response compared to *hy5* (Figure 3C). These results  
155 demonstrated that impairing DET1 and COP1 function can partially rescue root growth rate in  
156 response to higher ambient temperature. Importantly, neither *det1* nor *cop1* single mutants  
157 displayed an increased root growth response to temperature, suggesting that the genetic  
158 interaction between HY5, DET1 or COP1 is critical to modulate root thermomorphogenesis  
159 (Supplementary Figure 2B,C). To directly test whether HY5 and PIFs could co-regulate this  
160 process, we next simultaneously interfered with HY5 and PIF function using the *hy5 pifQ*  
161 quintuple mutant and analyzed growth responses to elevated temperature (Figure 3D-F).  
162 Consistent with this idea, both hypocotyl and root growth responses were significantly rescued  
163 compared to *hy5* mutants, demonstrating that HY5 and PIF pathways functionally interact to  
164 regulate shoot and root responses to temperature (Figure 3D-F). These results demonstrate  
165 that the activity of a shoot signaling module including HY5 and PIF genes mediates root  
166 response to temperature.

167 Taken together, our phenotypic analyses showed that enhanced shoot growth response was  
168 associated with a decreased root response to temperature, further suggesting that shoot and  
169 root thermomorphogenesis could be quantitatively negatively correlated. To test this idea, we  
170 combined measurements of hypocotyl and root growth of individual plants for nine different  
171 genotypes (wild type, *hy5-221*, *hy5*, *hy5-215*, *hy5 pifQ*, *hy5 cop1*, *hy5 det1*, *phyAB* and



172 *PIF4OX*). We then analyzed the relation between hypocotyl and root growth rate at 21°C, 27°C  
173 or the relation between their normalized growth rates (Figure 3G ; Supplementary Figure 2D-G).  
174 Remarkably, we observed that at 27°C, individual genotypes formed distinct groups with root  
175 growth rate decreasing as the hypocotyl growth increased, supporting the idea that these traits  
176 could be negatively correlated (Figure 3G). We next applied a linear regression model and  
177 observed a negative correlation between the root and the hypocotyl growth rate at 27°C  
178 ( $R^2=0.365$ ), indicating that root growth rate negatively correlates with hypocotyl growth rate at  
179 27°C (Figure 3H). Interestingly, we did not observe this relation at 21°C ( $R^2=0.064$ ) or when  
180 analyzing temperature responses ( $R^2=0.035$ ) (Supplementary Figure 2D-G), indicating that this  
181 hypocotyl-root growth correlation is specific to higher ambient temperature conditions. Together,  
182 these results show that upon increased ambient temperature, HY5-PIF module is required to  
183 balance hypocotyl with root growth responses and further suggest that a developmental trade-  
184 off governs hypocotyl and root growth response at higher ambient temperature.

185

#### 186 A shoot to root developmental trade-off in response to higher ambient temperature

187 The observation that shoot and the root thermomorphogenesis were negatively correlated was  
188 intriguing and prompted us to test whether modulating shoot thermo-response was sufficient to  
189 impact root growth. To investigate this idea, we used a genetic chimera approach by taking  
190 advantage of a HA-YFP-HA-HY5 fusion protein (DOF-HY5) that showed restricted cell-to-cell  
191 movement and aimed at driving its expression specifically in the shoot of *hy5* mutants using  
192 *CAB3* or *CER6* promoters (Burko et al, 2020b; Procko et al., 2016). In line with previous studies  
193 (Chen et al., 2016; Procko et al., 2016), we detected strong accumulation of DOF-HY5 in  
194 leaves, petioles and hypocotyls for both constructs, confirming that our *CAB3* and *CER6*  
195 promoters were driving expression in the shoot (Supplementary Figure 3A-F; Burko et al,  
196 2020b). While we detected DOF-HY5 accumulation in the root of the *pCER6:DOF-HY5* line, we  
197 did not detect fluorescence signal in the root of the *pCAB3:DOF-HY5* lines, indicating that  
198 expression driven from the *CAB3* promoter was specific to the shoot and that our tagged  
199 version of HY5 was not able to move from the shoot to the root (Figure 4A,C; Supplementary  
200 Figure 3A-F). To further confirm these observations, we assessed the accumulation of DOF-  
201 HY5 fusion protein either in the root or in the shoot using immunoblotting with a HY5 or a HA  
202 antibody (Figure 4D,E). Consistent with our microscopy observations, we observed that DOF-  
203 HY5 protein accumulated in the shoot of *pCAB3:DOF-HY5* lines whereas the detected protein  
204 levels were similar to *hy5* mutant in the root or were accumulating ubiquitously in the

205 *pCER6:DOF-HY5* line (Figure 4D,E). This provided us with valuable genetic material to further  
206 test whether HY5 local activity in the shoot could regulate the root response to temperature.  
207 We went on to analyze the functionality of the DOF-HY5 fusion protein by measuring hypocotyl  
208 and root growth upon response to increased ambient temperature in the *pCER6:DOF-HY5* line.  
209 Although *hy5* displayed an increased relative hypocotyl growth rate and a reduced root growth  
210 response, these responses were rescued to levels similar to wild type in the *pCER6:DOF-HY5*  
211 line, demonstrating that the DOF-HY5 fusion protein was functional (Supplementary Figure 3G-  
212 I). These results next prompted us to investigate the local function of HY5 in the shoot during  
213 temperature response by analyzing the *pCAB3:DOF-HY5* chimera rescue lines (Figure 4F,G). In  
214 line with DOF-HY5 accumulation in the shoot, both *pCAB3:DOF-HY5* lines displayed a partial  
215 rescue of the relative hypocotyl growth rate observed in *hy5* (Figure 4F). Strikingly, these two  
216 independent lines also showed a significant rescue of the root growth response compared to  
217 *hy5*, demonstrating that HY5 function in the shoot was sufficient to modulate root growth  
218 response to temperature (Figure 4G). Together, these results reveal that modulating shoot  
219 thermomorphogenesis by local HY5 rescue is sufficient to modulate root growth. Together with  
220 our previous analyses, these results demonstrate that a developmental trade-off governs  
221 hypocotyl and root growth responses to temperature.

222

### 223 Transcriptional change of metabolic genes in response to temperature

224 Having shown that a developmental trade-off quantitatively couples shoot and root  
225 thermomorphogenesis, we wanted to further delineate the regulatory mechanisms underlying  
226 this process. To this end, we used a genome-wide approach and profiled root transcriptomes  
227 after a short (4 hours) or a more prolonged (18 hours) temperature treatment using RNAseq.  
228 We first asked whether a core regulatory network could mediate responses to temperature in  
229 the root. To strengthen our approach and to alleviate the influence of the genotypes on the  
230 response, we compared the transcriptional changes in wild type, *hy5* and *phyAB* plants. Using  
231 this method, we identified 327 and 550 genes that were commonly regulated at the early and  
232 late time point respectively (Figure 5A,B). Consistent with the temperature treatment imposed  
233 onto the plants, the shared regulatory signatures at early time point were associated with heat  
234 response (“response to heat”, “response to hydrogen peroxide” and “response to high light  
235 intensity”) (Figure 5A). We also observed an enrichment for genes related to metabolism,  
236 particularly for members of the glucosinolate biosynthetic pathway and for sucrose transport  
237 genes, suggesting that increased ambient temperature might modulate energy metabolism at  
238 the root (Figure 5B).

239 To further characterize the regulatory function of HY5 and PHYs during root  
240 thermomorphogenesis, we next identified genes misregulated in *hy5* and *phyAB* compared to  
241 wild type at 27°C (Figure 5C). Strikingly, we observed significant overlap (hypergeometric test;  
242  $p < 0.001$ ) in the sets of genes that were upregulated or downregulated in *hy5* and *phyAB* mutant  
243 roots at both time points (Supplementary Figure 4A,B). This overlap supports our previous  
244 genetic analyses and demonstrates that HY5 and phytochromes regulate a set of common  
245 genes in the root (Figure 5C, Supplementary Figure 4A,B). Among the co-regulated genes, we  
246 identified known HY5 target genes – such as *HY5 HOMOLOG (HYH)*, *SUPPRESSOR OF*  
247 *PHYA (SPA)* gene family and *FHY1-LIKE (FHL)*– as well as known light signaling genes, which  
248 confirmed the quality of our dataset (Supplementary Figure 4C;(Burko et al., 2020; Ciolfi et al.,  
249 2013; Lee et al., 2007; Li et al., 2010)). Importantly, we also detected an enrichment for  
250 misregulated genes involved in the generation of precursor metabolites, suggesting that the  
251 metabolic status was altered in *hy5* and in *phyAB* mutant roots ( $p = 2.6e-14$ ; Figure 5C).  
252 Accordingly, all genes belonging to the GO category “generation of precursor metabolites and  
253 energy precursor” were significantly downregulated either in *hy5* or *phyAB* at both time points,  
254 indicating that HY5 and phytochrome activities are required for the expression of energy  
255 metabolism genes in the root ( $n = 35/35$ , Figure 5D). These results also show that the reduced  
256 root growth response observed in *hy5* and *phyAB* mutants correlates with a substantial  
257 downregulation of genes involved in the chemical reactions and pathways resulting in the  
258 formation of substances from which energy is derived or genes involved in releasing energy  
259 from these metabolites. Taken together, the analysis of transcriptional responses suggests that  
260 HY5 and phytochrome activity regulate root growth at higher temperature by modulating energy  
261 metabolism.

262

### 263 Auxin perception, signalling and biosynthesis mediate root thermomorphogenesis

264 Having shown that HY5 and phytochromes are required for the expression of energy precursor  
265 genes in the root, we next wanted to investigate whether other signals could regulate root  
266 thermomorphogenesis downstream of the HY5-PIF module. Some reports have demonstrated  
267 that auxin transport and signaling are required for the root response to higher ambient  
268 temperature (Feraru et al., 2019; Hanzawa et al., 2013; Wang et al., 2016), however these  
269 regulatory interactions have also been challenged and debated (Martins et al., 2017). This  
270 prompted us to first confirm the function of auxin homeostasis in our root growth assays.

271 Shifting plants from 21°C to 27°C led to increased auxin signaling as shown by the increased  
272 signal of the *pDR5v2:3xYFP-NLS* transcriptional reporter at the root tip and increased *IAA29*

273 gene expression (Supplementary Figure 5A-C, (Wang et al., 2016)). Consistent with previous  
274 reports (Wang et al., 2016), interfering with the auxin receptors TIR1 and AFB2 in *tir1*, *afb2* and  
275 *tir1 afb2* mutant also led to a significant reduction in root growth in response to temperature,  
276 demonstrating that auxin perception is required for this response (Figure 6A). To complement  
277 these data, we impaired another branch of auxin signaling by interfering with TMKs function,  
278 which are membrane localized receptor like kinases involved in the perception of auxin  
279 independently of the TIR/AFB system (Cao et al., 2019; Xu et al., 2014). Like observed with the  
280 *TIR/AFB* related mutants, we found a reduced root elongation in *tmk1,4* compared to wild type  
281 during the root temperature response (Figure 6B). Together, these results confirmed that auxin  
282 perception and signaling are required for root thermomorphogenesis.

283 We next hypothesized that auxin biosynthesis and the control of the hormone level at the root  
284 might also modulate root thermomorphogenesis. Thus, we examined the function of auxin  
285 biosynthesis by genetically interfering with *YUC* gene activity in the *yuc3,5,7,8,9* (*yucQ*)  
286 quintuple mutant. Accordingly, *yucQ* displayed a reduced root growth response compared to  
287 wild type, demonstrating that auxin biosynthesis through the activity of the YUCs is also  
288 required for root elongation upon higher ambient temperature (Figure 6C). Together, these data  
289 unambiguously demonstrate that auxin perception, signaling and biosynthesis are required for  
290 root thermomorphogenesis.

291

#### 292 HY5 and phytochromes regulate auxin homeostasis at the root

293 Having confirmed the function of auxin signaling during root thermomorphogenesis, we next  
294 asked whether HY5 and phytochromes could regulate this hormonal pathway. In our root  
295 transcriptome, we analyzed the overlap between genes misregulated in *hy5* or *phyAB* at 27°C  
296 and auxin responsive genes in the root as obtained from RNA-seq after 6 hours of indole 3-  
297 acetic acid (IAA) treatment (Omelyanchuk et al., 2017). Interestingly, we found a significant  
298 overlap of genes that were transcriptionally responding to IAA treatment and misregulated in  
299 *hy5* and *phyAB* at both early and late time points (Figure 6D, Supplementary Figure 6E). We  
300 also found that a significant proportion of genes whose transcriptional response to temperature  
301 was differentially regulated in *hy5* or *phyAB* mutants were also responding to auxin in the root  
302 (Supplementary Figure 6F). Together these results demonstrated that HY5 and phytochromes  
303 activities converged with the auxin regulatory network and further suggested that these factors  
304 might control auxin homeostasis during root thermomorphogenesis.

305 To further examine this idea, we assessed the state of the auxin metabolic pathway by  
306 measuring the concentration of IAA and its precursors in roots of wild type, *hy5* and *phyAB*

307 mutants 12 hours after a temperature shift. Surprisingly, we did not observe an increase in total  
308 auxin level after temperature shift in wild type root, suggesting that the increase in total auxin  
309 level is not required for root thermomorphogenesis, unlike what has been reported for the shoot  
310 (Figure 5E;(Gray et al., 1998)). Interestingly, we observed a significant decrease in IAA levels as  
311 well as some of the auxin precursors in *hy5* and *phyAB* roots compared to wild type  
312 demonstrating that HY5 and phytochromes are required to maintain IAA levels in the root  
313 independently of temperature (Figure 6E, Supplementary Figure 5G-H). We also observed a  
314 decrease in the relative IAA level in *hy5* and *phyAB* mutants compared to wild type upon  
315 increased ambient temperature, indicating that the dynamics of auxin accumulation in the root is  
316 impaired upon loss of HY5 and phytochrome activity (Figure 6F). Together these results show  
317 that HY5 and phytochrome are required to maintain auxin levels and control the response upon  
318 increased temperature in the root. Together, these results also suggest that HY5 and  
319 phytochromes control root thermomorphogenesis by regulating auxin levels.

320

321

## 322 Discussion

323

324 In this study, we investigated the regulatory mechanisms controlling root thermomorphogenesis.  
325 Using a genetic approach combined with phenotypic analyses, we find that a regulatory module  
326 –including HY5 and phytochromes– concomitantly modulates shoot and root growth responses  
327 to higher temperature. In addition, we gain insight on the function of auxin signaling pathway  
328 and its connection with HY5 and phytochromes during root thermomorphogenesis (Figure 7).  
329 Together, our findings highlight that a developmental trade-off governs shoot and root growth  
330 responses and further suggests that roots integrate energy signals with hormonal inputs during  
331 thermomorphogenesis.

332 We showed that HY5 and the phytochromes are required for the root response to temperature.  
333 In line with published reports, interfering with PIF activity did not lead to impaired root growth  
334 responses to temperature, which previously led to the conclusion that PIFs were not regulating  
335 root responses to temperature (Martins et al., 2017). However, we observe that a PIF4 gain-of-  
336 function phenocopies the *hy5* and *phyAB* mutant phenotypes, showing that PIF4 is sufficient to  
337 regulate root thermomorphogenesis. This result fits well with previous reports showing that PIF  
338 activity increases in phytochrome mutants (Park et al., 2018). Furthermore, HY5 acts  
339 antagonistically to PIF4 at the promoter of multiple target genes and interfering with HY5  
340 function could enhance PIF4-mediated gene regulation (Gangappa and Kumar, 2017).  
341 Accordingly, shoot and root phenotypes in *hy5* mutants are suppressed by dampening PIF  
342 expression, demonstrating that HY5 genetically interacts with PIFs during shoot and root  
343 thermomorphogenesis. Thus, our results support a model where PIF4 acts downstream of the  
344 phytochromes and functionally converges with HY5 to regulate root thermomorphogenesis.  
345 Future experiments interfering with phytochromes and PIFs function in higher order mutants will  
346 be important to further dissect the function of this regulatory circuit during  
347 thermomorphogenesis.

348 In this context, HY5 also genetically interacts with COP1 and DET1 as shown by the  
349 suppression of *hy5* phenotypes in *hy5 det1* and *hy5 cop1*. Interestingly, although the *det1-1*  
350 mutant responds similarly to control plants, *cop1-4* shows decreased root growth in response to  
351 temperature. This result is intriguing since DET1 and COP1 act together in order to promote  
352 HY5 degradation (reviewed in (Lau and Deng, 2012)). Thus, our results also suggest that  
353 COP1 can signal independently from HY5 during root thermomorphogenesis. Intriguingly, it was  
354 previously shown that COP1 can regulate the polarity of auxin-efflux transporter PIN2 in the root  
355 (Sassi et al., 2012). In this context, our findings that *SPA* genes are regulated by HY5 in the root

356 further suggests that the HY5-COP1-SPA module could constitute an intertwined regulatory loop  
357 to control root response to temperature. Thus, it will be important to further unravel the function  
358 of COP1 or SPAs and to understand whether the interaction with auxin transport is relevant for  
359 root thermomorphogenesis.

360 Our finding that a shoot regulatory module can control hypocotyl growth response and can  
361 concomitantly modulate root growth raises interesting questions as to how these two processes  
362 are coordinated. Our current data suggest two putative mechanisms that could act in parallel to  
363 coordinate shoot with root thermomorphogenesis.

364 First, our data suggest that temperature responses are tightly connected with the energy  
365 metabolism. The observed negative correlation between hypocotyl and root growth responses  
366 and the associated downregulation of metabolic precursor genes that play a role in chemical  
367 reactions and pathways from which energy is released indicate these two processes could be  
368 coordinated by a limitation of metabolic resources that are required during enhanced hypocotyl  
369 growth. This hypothesis is consistent with classical studies on biomass allocation between  
370 shoots and roots (Shiple and Meziane, 2002; Thornley, 1972). In this context, one possible  
371 relevant energy signal could be sucrose, which is produced in the shoot through photosynthesis  
372 and has been shown to act as a long-distance signal to promote root growth (Kircher and  
373 Schopfer, 2012). Interestingly we found in our genome-wide expression analysis of root  
374 responses to temperature that a significant proportion of genes involved in sucrose transport  
375 was enriched, suggesting that changes in sugar availability could regulate shoot-to-root growth  
376 coordination upon increased ambient temperature. In addition, HY5-PIF4 have been shown to  
377 directly regulate the expression of photosynthetic genes and consequently the production of  
378 chlorophyll content in young seedlings. Accordingly, *hy5* mutants display lower chlorophyll  
379 content than wild type at 27°C (Toledo-Ortiz et al., 2014), which could have a direct impact on  
380 the production of photosynthesis-derived sucrose and consequently on root growth. Given that  
381 *hy5* mutant still displayed a reduced root response to increased ambient temperature in medium  
382 that was not supplemented with sucrose, we believe that external sucrose would have limited  
383 impact on this process. Together these data suggest that the availability of energy signals at the  
384 shoot could modulate root growth response upon increased ambient temperature.

385 In parallel to this pathway, another important signal could be the phytohormone auxin. We  
386 confirmed that auxin perception and signaling are required for root thermomorphogenesis.  
387 Remarkably, we also show that auxin biosynthesis is required, suggesting that the control of  
388 auxin levels is critical to regulate root response to temperature. Auxin signaling output is tightly  
389 connected to its transport within and across tissues (reviewed in (Benjamins and Scheres,

390 2008). During shoot responses to temperature, auxin is produced in the cotyledons and  
391 transported to the hypocotyl to promote cell elongation (Bellstaedt et al., 2019). Furthermore,  
392 the modulation of auxin long-distance transport from the shoot to the root can regulate root  
393 developmental responses to environmental light conditions (Sassi et al., 2012). When seedlings  
394 are exposed to darkness, auxin levels and signaling decrease in the shoot. This decrease in the  
395 shoot concomitantly leads to auxin depletion in the roots as the amount of the hormone  
396 transported from the shoot to the root is reduced, thereby inhibiting root growth (Sassi et al.,  
397 2012). Our measurements of auxin levels show that *hy5* and phytochrome mutants display  
398 lower auxin levels than wild type and that these levels decrease upon increased ambient  
399 temperature. These results suggest that the auxin-driven hypocotyl growth in *hy5* and *phyAB*  
400 could shift the auxin balance between the shoot and the root, leading to depletion of auxin levels  
401 in the root and consequently lead to reduced root growth response to temperature. In contrast to  
402 this scenario, other studies suggested that auxin produced in the shoot may not be transported  
403 in the root as promoting auxin biosynthesis in the shoot cannot rescue the defects resulting from  
404 the loss of function of the *YUC* auxin biosynthesis genes in the root (Chen et al., 2014). Thus, it  
405 will be critical to further investigate the dynamics of auxin production, signaling and transport as  
406 well as to how it is coordinated between shoot and root during thermomorphogenesis.  
407 Together with our findings, these hypotheses open new avenues to further characterize the  
408 communication between shoot and root, which could have important implications for plant  
409 growth and biomass allocation upon environmental challenges. Studies have commonly used  
410 micro-grafting experiments to investigate long distance signaling between the shoot and the root  
411 (Chen et al., 2006, 2016). Given that we analyzed growth response to temperature at early  
412 seedling stage, this strategy remains technically challenging as the impact of sectioning on the  
413 growth response might override the effect of the genetic backgrounds used as scion. Instead we  
414 have used domain-specific rescue approach (Hacham et al., 2011; Kang et al., 2017) by driving  
415 a tagged version of HY5 under a shoot-specific promoter. In line with the specificity of the shoot  
416 expression, we did not detect fluorescent signal, nor HY5 protein accumulation in the root by  
417 immuno-blotting. Although these experimental methods cannot fully exclude that traces of HY5  
418 protein are still present, the levels would be considerably lower than the wild type and unlikely to  
419 have strong impact on the observed phenotype. Thus, we propose that using shoot-specific or  
420 root-specific genetics with tools such as the CAB3 or the INORGANIC PHOSPHATE  
421 TRANSPORTER 1-1 (PHT1:1) promoters (Procko et al., 2016; Vijaybhaskar et al., 2008) could



422 be valuable to further elucidate how the shoot and the root communicate during  
423 thermomorphogenesis.

424 Based on our results, we propose a model where roots integrate systemic signals modulated by  
425 a shoot module including HY5, phytochromes with more locally acting auxin signaling during  
426 thermomorphogenesis (Figure 7). The integration of signals that are relayed from the shoot as  
427 well as more local ones in the root could constitute a flexible system to adapt growth in  
428 response to changes in air temperature perceived in the shoot while at the same time tuning  
429 growth locally by modulating hormonal homeostasis. Thus, it will be important in the future to  
430 further understand to what extent these two signaling pathways interact and how they are  
431 coupled at the temporal level.

432

## 433 Material and methods

434

### 435 Plant material and growth conditions

436 In this study we used the following published lines: *phyAB* (Zheng et al., 2013), *hy5* (Jia et al.,  
437 2014), *hy5-221*, *hy5-215*, *hy5-1* (Oyama et al., 1997), *phyA-211* (Reed et al., 1994), *phyB-9*  
438 (Reed et al., 1993), *pif4-101* (Lorrain et al., 2008), *pif1,3,4,5 (pifQ)*(Leivar et al., 2008), PIF4-OX  
439 (pPIF4:PIF4-FLAG)(Gangappa and Kumar, 2017), *hy5 pifQ* (Jia et al., 2014), *det1-1* (Pepper et  
440 al., 1994), *cop1-4* (McNellis et al., 1994), *hy5 det1* (Gangappa and Kumar, 2017), *hy5 cop1*  
441 (Rolauuffs et al., 2012), *tir1-1*, *afb2-3*, *tir afb2* (Parry et al., 2009), *tmk1 tmk4* (Dai et al., 2013),  
442 *yucca3,5,7,8,9 (yucQ)* (Chen et al., 2014), DR5v2 (Liao et al., 2015). CAB3, CER6 promoters  
443 were previously described (Procko et al. 2016) and the DOF (HA-YFP-HA) tag was described in  
444 (Burger et al. 2017). HY5 rescue lines were generated by inserting *pCAB3:HA-YFP-HA-HY5*  
445 and *pCER6:HA-YFP-HA-HY5* in the *hy5* background (Lian et al., 2011) as described in (Burko  
446 et al, 2020b).

447 When not specified, plants were grown in long day conditions (16/8h) in walk-in growth  
448 chambers (Convion, Winnipeg, Manitoba, Canada) at 21°C or 27°C, 60% humidity, at 146 PAR  
449 (see source data for light spectra). During nighttime, temperature was decreased to 15°C and  
450 21°C respectively. In our growth condition 2, plants were grown in reach-in growth chambers at  
451 60% humidity, 122 PAR (see source data for light spectra), temperature was kept constant at  
452 either 21°C or 27°C. Environmental conditions were established and monitored with commercial  
453 software (Valoya, Helsinki, Finland).

454 Roots grown on plates in the dark were isolated from light using metal combs that contained  
455 holes and plates were wrapped with aluminum foil.

456 Plants were cultivated on plates containing ½ Murashige Skoog (Caisson, Smithfield, UT, USA),  
457 1%MES (Acros Organic, Hampton, NH, USA), 1% sucrose (Fisher Bioreagents, Hampton, NH,  
458 USA) and 0.8% Agar powder (Caisson, Smithfield, UT, USA). For temperature shift experiments,  
459 plants were germinated and grown until 3 days after germination at 21°C to synchronize their  
460 development. On the third day, plants were shifted at ZT1-3 at 27°C and grown for 3 additional  
461 days at 21°C or 27°C.

462

### 463 Root measurements and analysis

464 Root images were acquired using a multiplex scanning system as described in (Slovak et al.,  
465 2014). Images were processed using the Fiji software (<https://fiji.sc/>). Root and hypocotyl

466 lengths were measured at 3DAG (before temperature shift) and at 6DAG. Growth rate were  
467 obtained by subtracting the length at 6DAG and 3DAG. Normalized growth rates were  
468 calculated by dividing root growth rate at 27°C by the average growth rate at 21°C. Raw values  
469 for individual temperatures can be found in the source data file.

470 For the time course analysis of normalized root growth rate, plates were scanned at 0, 12, 24,  
471 48, 72 hours after temperature shift. Images were stacked with Image J and root length was  
472 measured at individual time points.

473 Statistical analysis was performed using Excel (Microsoft, Redmond, WA, USA) or R software  
474 (<https://www.r-project.org/>). Linear regression was performed using the lm function in R and  
475 graph displayed with ggplot2 (<https://www.r-project.org/>) (codes are available upon request).

476 Confocal pictures were acquired on a Zeiss 710 inverted microscope (Zeiss, Oberkochen,  
477 Germany) or on Zeiss CSU Spinning Disk Confocal Microscope (Salk Biophotonics Core).  
478 Pictures were processed using Fiji software (<https://fiji.sc/>). Root meristem size was measured  
479 from the quiescent center to the first cortical cell that is twice as long as wide as was previously  
480 described (Feraru et al., 2019).

481 Dot plots were generated using the plots of data online tool (Postma and Goedhart, 2019).

482

#### 483 Immunoblotting

484 Western blots were performed as described in (Li et al., 2012) with minor modifications. 25 roots  
485 and 20 shoots were harvested at 6DAG and extracted in 2X loading buffer (36µl bME+1ml 4x  
486 loading buffer). Loading buffer was added to roots (70µl) and shoots (140µl) and then boiled  
487 for 5 min. Bis-tris gel 4-12% (Invitrogen, Carlsbad, CA, USA) and semi-dry transfer (Pierce G2  
488 Fast Blotter, Thermo Scientific, Waltham, MA, USA) were used. Primary antibodies used were  
489 αHA-HRP 1:2000 (12013819001 Roche), αHY5(N) 1:5000 (R1245-1b ABicode), αActin  
490 1:30,000 (A0408 Sigma).

491

#### 492 Gene expression analysis

493 Biological triplicates were analysed. Total RNA was extracted from roots or shoot of plants 6  
494 DAG using RNA easy kit (Qiagen, Hilden, Germany). RNA was treated with DNase using the  
495 Turbo DNA-free kit (Invitrogen, Carlsbad, CA, USA) and further purified on columns from the  
496 RNA easy kit.

497 Next generation sequencing (NGS) library was generated using the TruSeq Stranded mRNA  
498 library prep kits (Illumina, San Diego, CA, USA). Libraries were sequenced on HiSeq2500

499 (Illumina, San Diego, CA, USA) as single read 50bases. Raw reads can be found at GEO under  
500 the number: GSE138133.

501 NGS analysis was performed using Tophat2 for mapping reads on the Arabidopsis genome  
502 (TAIR10) (Kim et al., 2013, p. 2), HT-seq for counting reads (Anders et al., 2014) and EdgeR for  
503 quantifying differential expression (Robinson et al., 2009). We set a threshold for differentially  
504 expressed genes (Fold change (FC) >2 or FC<-2, FDR<0.01). Genotype x Environment  
505 interaction analysis was performed using linear model and type II ANOVA in R (codes are  
506 available upon request).

507 Gene ontology analysis was performed using AgriGOv2 online tool (Tian et al., 2017). Venn  
508 diagrams were generated with the VIB online tool  
509 (<http://bioinformatics.psb.ugent.be/webtools/Venn/>).

510

#### 511 Auxin measurements

512 For auxin measurement, plants were shifted at ZT1-3 at 27°C, grown at 21°C or 27°C and  
513 harvested at ZT 13-15.

514 The extraction, purification and the LC-MS analysis of endogenous IAA, its precursors and  
515 metabolites were carried out according to (Novák et al., 2012). Briefly, approx. 10 mg of frozen  
516 material per sample was homogenized using a bead mill (27 hz, 10 min, 4°C; MixerMill, Retsch  
517 GmbH, Haan, Germany) and extracted in 1 ml of 50 mM sodium phosphate buffer containing  
518 1% sodium diethyldithiocarbamate and the mixture of <sup>13</sup>C<sub>6</sub>- or deuterium-labeled internal  
519 standards. After centrifugation (14000 RPM, 15 min, 4°C), the supernatant was divided in two  
520 aliquots, the first aliquot was derivatized using cysteamine (0.25 M; pH 8; 1h; room temperature;  
521 Sigma-Aldrich), the second aliquot was immediately further processed as following. The pH of  
522 sample was adjusted to 2.5 by 1 M HCl and applied on preconditioned solid-phase extraction  
523 column Oasis HLB (30 mg 1 cc, Waters Inc., Milford, MA, USA). After sample application, the  
524 column was rinsed with 2 ml 5% methanol. Compounds of interest were then eluted with 2 ml  
525 80% methanol. Derivatized fraction was purified alike. Mass spectrometry analysis and  
526 quantification were performed by an LC-MS/MS system comprising of a 1290 Infinity Binary LC  
527 System coupled to a 6490 Triple Quad LC/MS System with Jet Stream and Dual Ion Funnel  
528 technologies (Agilent Technologies, Santa Clara, CA, USA).

529 Raw measurements for individual temperatures can be found in the source data file.

530

#### 531 Competing interests

532 The authors declare no competing interests

533 Acknowledgements

534 We would like to thank Yvon Jaillais (ENS, Lyon, France), Mark Estelle (UCSD, La Jolla, USA),  
535 Yunde Zhao (UCSD, La Jolla, USA), and members of the Chory lab (Bjorn Willige, Adam  
536 Seluzicki; Salk Institute, La Jolla, USA) for kindly sharing published mutant plant lines with us.  
537 We would also like to thank members of the Busch laboratory for critically reading the  
538 manuscript. This study was funded by the National Institute of General Medical Sciences of the  
539 National Institutes of Health (grant number R01GM127759 to W.B.) and start-up funds from the  
540 Salk Institute for Biological Studies. J.C. is investigator of the Howard Hughes Medical Institute.  
541 This study was supported by the HHS NIH National Institute of General Medical Sciences (grant  
542 5R35GM122604-02\_05 to J.C.), the Howard Hughes Medical Institute (to J. C.), the European  
543 Molecular Biology Organization (grant ALTF 785-2013 to Y.B.), the United States-Israel  
544 Binational Agricultural Research and Development Fund (grant FI-488-13 to Y.B). K.L. and J.S.  
545 acknowledge the Swedish research councils VINNOVA, VR and the Knut and Alice Wallenberg  
546 Foundation (KAW). They also thank the Swedish Metabolomics Centre  
547 (<http://www.swedishmetabolomicscentre.se/>) for access to instrumentation.

## References

- Anders, S., Pyl, P.T., Huber, W., 2014. HTSeq—a Python framework to work with high-throughput sequencing data. *Bioinformatics* 31, 166–169. <https://doi.org/10.1093/bioinformatics/btu638>
- Bellstaedt, J., Trenner, J., Lippmann, R., Poeschl, Y., Zhang, X., Friml, J., Quint, M., Delker, C., 2019. A Mobile Auxin Signal Connects Temperature Sensing in Cotyledons with Growth Responses in Hypocotyls. *Plant Physiol.* 180, 757. <https://doi.org/10.1104/pp.18.01377>
- Benjamins, R., Scheres, B., 2008. Auxin: The Looping Star in Plant Development. *Annu. Rev. Plant Biol.* 59, 443–465. <https://doi.org/10.1146/annurev.arplant.58.032806.103805>
- Burko, Y., Seluzicki, A., Zander, M., Pedmale, U.V., Ecker, J.R., Chory, J., 2020. Chimeric Activators and Repressors Define HY5 Activity and Reveal a Light-Regulated Feedback Mechanism. *Plant Cell* 32, 967. <https://doi.org/10.1105/tpc.19.00772>
- Burko, Y., Gaillochet, C., Seluzicki, A., Chory, J., Busch, W. 2020b. Local HY5 activity mediates hypocotyl growth and shoot-to-root communication. *Biorxiv*
- Cao, M., Chen, R., Li, P., Yu, Y., Zheng, R., Ge, D., Zheng, W., Wang, X., Gu, Y., Gelová, Z., Friml, J., Zhang, H., Liu, R., He, J., Xu, T., 2019. TMK1-mediated auxin signalling regulates differential growth of the apical hook. *Nature* 568, 240–243. <https://doi.org/10.1038/s41586-019-1069-7>
- Chen, A., Komives, E.A., Schroeder, J.I., 2006. An Improved Grafting Technique for Mature Arabidopsis Plants Demonstrates Long-Distance Shoot-to-Root Transport of Phytochelatins in Arabidopsis. *Plant Physiol.* 141, 108. <https://doi.org/10.1104/pp.105.072637>
- Chen, Q., Dai, X., De-Paoli, H., Cheng, Y., Takebayashi, Y., Kasahara, H., Kamiya, Y., Zhao, Y., 2014. Auxin Overproduction in Shoots Cannot Rescue Auxin Deficiencies in Arabidopsis Roots. *Plant Cell Physiol.* 55, 1072–1079. <https://doi.org/10.1093/pcp/pcu039>
- Chen, X., Yao, Q., Gao, X., Jiang, C., Harberd, N.P., Fu, X., 2016. Shoot-to-Root Mobile Transcription Factor HY5 Coordinates Plant Carbon and Nitrogen Acquisition. *Curr. Biol.* 26, 640–646. <https://doi.org/10.1016/j.cub.2015.12.066>
- Ciolfi, A., Sessa, G., Sassi, M., Possenti, M., Salvucci, S., Carabelli, M., Morelli, G., Ruberti, I., 2013. Dynamics of the Shade-Avoidance Response in Arabidopsis. *Plant Physiol.* 163, 331–353. <https://doi.org/10.1104/pp.113.221549>
- Dai, N., Wang, W., Patterson, S.E., Bleecker, A.B., 2013. The TMK Subfamily of Receptor-Like Kinases in Arabidopsis Display an Essential Role in Growth and a Reduced Sensitivity to Auxin. *PLOS ONE* 8, 1–12. <https://doi.org/10.1371/journal.pone.0060990>
- Delker, C., Sonntag, L., James, G.V., Janitza, P., Ibañez, C., Ziermann, H., Peterson, T., Denk, K., Mull, S., Ziegler, J., Davis, S.J., Schneeberger, K., Quint, M., 2014. The DET1-COP1-HY5 Pathway Constitutes a Multipurpose Signaling Module Regulating Plant Photomorphogenesis and Thermomorphogenesis. *Cell Rep.* 9, 1983–1989. <https://doi.org/10.1016/j.celrep.2014.11.043>
- Donohue, K., Rubio de Casas, R., Burghardt, L., Kovach, K., Willis, C.G., 2010. Germination, Postgermination Adaptation, and Species Ecological Ranges. *Annu. Rev. Ecol. Evol. Syst.* 41, 293–319. <https://doi.org/10.1146/annurev-ecolsys-102209-144715>
- Feraru, E., Feraru, M.I., Barbez, E., Waidmann, S., Sun, L., Gaidora, A., Kleine-Vehn, J., 2019. PILS6 is a temperature-sensitive regulator of nuclear auxin input and organ growth in Arabidopsis thaliana. *Proc. Natl. Acad. Sci.* 116, 3893. <https://doi.org/10.1073/pnas.1814015116>

- Franklin, K.A., Lee, S.H., Patel, D., Kumar, S.V., Spartz, A.K., Gu, C., Ye, S., Yu, P., Breen, G., Cohen, J.D., Wigge, P.A., Gray, W.M., 2011. PHYTOCHROME-INTERACTING FACTOR 4 (PIF4) regulates auxin biosynthesis at high temperature. *Proc. Natl. Acad. Sci.* 108, 20231–20235. <https://doi.org/10.1073/pnas.1110682108>
- Gangappa, S.N., Botto, J.F., 2016. The Multifaceted Roles of HY5 in Plant Growth and Development. *Mol. Plant* 9, 1353–1365. <https://doi.org/10.1016/j.molp.2016.07.002>
- Gangappa, S.N., Kumar, S.V., 2017. DET1 and HY5 Control PIF4-Mediated Thermosensory Elongation Growth through Distinct Mechanisms. *Cell Rep.* 18, 344–351. <https://doi.org/10.1016/j.celrep.2016.12.046>
- Gray, W.M., Östin, A., Sandberg, G., Romano, C.P., Estelle, M., 1998. High temperature promotes auxin-mediated hypocotyl elongation in *Arabidopsis*. *Proc Natl Acad Sci USA* 95, 7197. <https://doi.org/10.1073/pnas.95.12.7197>
- Ha, J.-H., Han, S.-H., Lee, H.-J., Park, C.-M., 2017. Environmental Adaptation of the Heterotrophic-to-Autotrophic Transition: The Developmental Plasticity of Seedling Establishment. *Crit. Rev. Plant Sci.* 36, 128–137. <https://doi.org/10.1080/07352689.2017.1355661>
- Hacham, Y., Holland, N., Butterfield, C., Ubeda-Tomas, S., Bennett, M.J., Chory, J., Savaldi-Goldstein, S., 2011. Brassinosteroid perception in the epidermis controls root meristem size. *Development* 138, 839. <https://doi.org/10.1242/dev.061804>
- Hanzawa, T., Shibasaki, K., Numata, T., Kawamura, Y., Gaude, T., Rahman, A., 2013. Cellular Auxin Homeostasis under High Temperature Is Regulated through a SORTING NEXIN1-Dependent Endosomal Trafficking Pathway. *Plant Cell* 25, 3424–3433. <https://doi.org/10.1105/tpc.113.115881>
- Hoecker, U., 2017. The activities of the E3 ubiquitin ligase COP1/SPA, a key repressor in light signaling. *Curr. Opin. Plant Biol.* 37, 63–69. <https://doi.org/10.1016/j.pbi.2017.03.015>
- Illston, B.G., Fiebrich, C.A., 2017. Horizontal and vertical variability of observed soil temperatures. *Geosci. Data J.* 4, 40–46. <https://doi.org/10.1002/gdj3.47>
- Jia, K.-P., Luo, Q., He, S.-B., Lu, X.-D., Yang, H.-Q., 2014. Strigolactone-Regulated Hypocotyl Elongation Is Dependent on Cryptochrome and Phytochrome Signaling Pathways in *Arabidopsis*. *Mol. Plant* 7, 528–540. <https://doi.org/10.1093/mp/sst093>
- Jung, J.-H., Domijan, M., Klose, C., Biswas, S., Ezer, D., Gao, M., Khattak, A.K., Box, M.S., Charoensawan, V., Cortijo, S., Kumar, M., Grant, A., Locke, J.C.W., Schäfer, E., Jaeger, K.E., Wigge, P.A., 2016. Phytochromes function as thermosensors inseparability. *Science* 354, 886. <https://doi.org/10.1126/science.aaf6005>
- Kang, Y.H., Breda, A., Hardtke, C.S., 2017. Brassinosteroid signaling directs formative cell divisions and protophloem differentiation in *Arabidopsis* root meristems. *Development* 144, 272. <https://doi.org/10.1242/dev.145623>
- Kim, D., Perteza, G., Trapnell, C., Pimentel, H., Kelley, R., Salzberg, S.L., 2013. TopHat2: accurate alignment of transcriptomes in the presence of insertions, deletions and gene fusions. *Genome Biol.* 14, R36. <https://doi.org/10.1186/gb-2013-14-4-r36>
- Kircher, S., Schopfer, P., 2012. Photosynthetic sucrose acts as cotyledon-derived long-distance signal to control root growth during early seedling development in *Arabidopsis*. *Proc. Natl. Acad. Sci.* 109, 11217. <https://doi.org/10.1073/pnas.1203746109>
- Koini, M.A., Alvey, L., Allen, T., Tilley, C.A., Harberd, N.P., Whitelam, G.C., Franklin, K.A., 2009. High Temperature-Mediated Adaptations in Plant Architecture Require the bHLH Transcription Factor PIF4. *Curr. Biol.* 19, 408–413. <https://doi.org/10.1016/j.cub.2009.01.046>
- Kumar, S.V., Lucyshyn, D., Jaeger, K.E., Alós, E., Alvey, E., Harberd, N.P., Wigge, P.A., 2012. Transcription factor PIF4 controls the thermosensory activation of flowering. *Nature* 484, 242–245. <https://doi.org/10.1038/nature10928>

- Lau, O.S., Deng, X.W., 2012. The photomorphogenic repressors COP1 and DET1: 20 years later. *Trends Plant Sci.* 17, 584–593. <https://doi.org/10.1016/j.tplants.2012.05.004>
- Lee, J., He, K., Stolc, V., Lee, H., Figueroa, P., Gao, Y., Tongprasit, W., Zhao, H., Lee, I., Deng, X.W., 2007. Analysis of Transcription Factor HY5 Genomic Binding Sites Revealed Its Hierarchical Role in Light Regulation of Development. *Plant Cell* 19, 731. <https://doi.org/10.1105/tpc.106.047688>
- Legris, M., Klose, C., Burgie, E.S., Rojas, C.C.R., Neme, M., Hiltbrunner, A., Wigge, P.A., Schäfer, E., Vierstra, R.D., Casal, J.J., 2016. Phytochrome B integrates light and temperature signals in Arabidopsis. *Science* 354, 897. <https://doi.org/10.1126/science.aaf5656>
- Leivar, P., Monte, E., Oka, Y., Liu, T., Carle, C., Castillon, A., Huq, E., Quail, P.H., 2008. Multiple Phytochrome-Interacting bHLH Transcription Factors Repress Premature Seedling Photomorphogenesis in Darkness. *Curr. Biol.* 18, 1815–1823. <https://doi.org/10.1016/j.cub.2008.10.058>
- Li, J., Li, G., Gao, S., Martinez, C., He, G., Zhou, Z., Huang, X., Lee, J.-H., Zhang, H., Shen, Y., Wang, H., Deng, X.W., 2010. Arabidopsis Transcription Factor ELONGATED HYPOCOTYL5 Plays a Role in the Feedback Regulation of Phytochrome A Signaling. *Plant Cell* 22, 3634–3649. <https://doi.org/10.1105/tpc.110.075788>
- Li, L., Ljung, K., Breton, G., Schmitz, R.J., Pruneda-Paz, J., Cowing-Zitron, C., Cole, B.J., Ivans, L.J., Pedmale, U.V., Jung, H.-S., Ecker, J.R., Kay, S.A., Chory, J., 2012. Linking photoreceptor excitation to changes in plant architecture. *Genes Dev.* 26, 785–790. <https://doi.org/10.1101/gad.187849.112>
- Lian, H.-L., He, S.-B., Zhang, Y.-C., Zhu, D.-M., Zhang, J.-Y., Jia, K.-P., Sun, S.-X., Li, L., Yang, H.-Q., 2011. Blue-light-dependent interaction of cryptochrome 1 with SPA1 defines a dynamic signaling mechanism. *Genes Dev.* 25, 1023–1028. <https://doi.org/10.1101/gad.2025111>
- Liao, C.-Y., Smet, W., Brunoud, G., Yoshida, S., Vernoux, T., Weijers, D., 2015. Reporters for sensitive and quantitative measurement of auxin response. *Nat. Methods* 12, 207.
- Lorrain, S., Allen, T., Duek, P.D., Whitelam, G.C., Fankhauser, C., 2008. Phytochrome-mediated inhibition of shade avoidance involves degradation of growth-promoting bHLH transcription factors. *Plant J.* 53, 312–323. <https://doi.org/10.1111/j.1365-313X.2007.03341.x>
- Martins, S., Montiel-Jorda, A., Cayrel, A., Huguet, S., Roux, C.P.-L., Ljung, K., Vert, G., 2017. Brassinosteroid signaling-dependent root responses to prolonged elevated ambient temperature. *Nat. Commun.* 8, 309. <https://doi.org/10.1038/s41467-017-00355-4>
- McNellis, T.W., von Arnim, A.G., Araki, T., Komeda, Y., Miséra, S., Deng, X.W., 1994. Genetic and molecular analysis of an allelic series of cop1 mutants suggests functional roles for the multiple protein domains. *Plant Cell* 6, 487. <https://doi.org/10.1105/tpc.6.4.487>
- Novák, O., Hényková, E., Sairanen, I., Kowalczyk, M., Pospíšil, T., Ljung, K., 2012. Tissue-specific profiling of the Arabidopsis thaliana auxin metabolome. *Plant J.* 72, 523–536. <https://doi.org/10.1111/j.1365-313X.2012.05085.x>
- Omelyanchuk, N.A., Wiebe, D.S., Novikova, D.D., Levitsky, V.G., Klimova, N., Gorelova, V., Weinholdt, C., Vasiliev, G.V., Zemlyanskaya, E.V., Kolchanov, N.A., Kochetov, A.V., Grosse, I., Mironova, V.V., 2017. Auxin regulates functional gene groups in a fold-change-specific manner in Arabidopsis thaliana roots. *Sci. Rep.* 7, 2489. <https://doi.org/10.1038/s41598-017-02476-8>
- Osterlund, M.T., Hardtke, C.S., Wei, N., Deng, X.W., 2000. Targeted destabilization of HY5 during light-regulated development of Arabidopsis. *Nature* 405, 462–466. <https://doi.org/10.1038/35013076>



- Oyama, T., Shimura, Y., Okada, K., 1997. The Arabidopsis HY5 gene encodes a bZIP protein that regulates stimulus-induced development of root and hypocotyl. *Genes Dev.* 11, 2983–2995. <https://doi.org/10.1101/gad.11.22.2983>
- Park, E., Kim, J., Lee, Y., Shin, J., Oh, E., Chung, W.-I., Liu, J.R., Choi, G., 2004. Degradation of Phytochrome Interacting Factor 3 in Phytochrome-Mediated Light Signaling. *Plant Cell Physiol.* 45, 968–975. <https://doi.org/10.1093/pcp/pch125>
- Park, E., Kim, Y., Choi, G., 2018. Phytochrome B Requires PIF Degradation and Sequestration to Induce Light Responses across a Wide Range of Light Conditions. *Plant Cell* 30, 1277. <https://doi.org/10.1105/tpc.17.00913>
- Parry, G., Calderon-Villalobos, L.I., Prigge, M., Peret, B., Dharmasiri, S., Itoh, H., Lechner, E., Gray, W.M., Bennett, M., Estelle, M., 2009. Complex regulation of the TIR1/AFB family of auxin receptors. *Proc. Natl. Acad. Sci.* 106, 22540. <https://doi.org/10.1073/pnas.0911967106>
- Penfield, S., 2008. Temperature perception and signal transduction in plants. *New Phytol.* 179, 615–628. <https://doi.org/10.1111/j.1469-8137.2008.02478.x>
- Pepper, A., Delaney, T., Washburnt, T., Poole, D., Chory, J., 1994. DET1, a negative regulator of light-mediated development and gene expression in arabidopsis, encodes a novel nuclear-localized protein. *Cell* 78, 109–116. [https://doi.org/10.1016/0092-8674\(94\)90577-0](https://doi.org/10.1016/0092-8674(94)90577-0)
- Postma, M., Goedhart, J., 2019. PlotsOfData—A web app for visualizing data together with their summaries. *PLOS Biol.* 17, e3000202. <https://doi.org/10.1371/journal.pbio.3000202>
- Procko, C., Burko, Y., Jaillais, Y., Ljung, K., Long, J.A., Chory, J., 2016. The epidermis coordinates auxin-induced stem growth in response to shade. *Genes Dev.* 30, 1529–1541. <https://doi.org/10.1101/gad.283234.116>
- Quint, M., Delker, C., Franklin, K.A., Wigge, P.A., Halliday, K.J., van Zanten, M., 2016. Molecular and genetic control of plant thermomorphogenesis. *Nat. Plants* 2, 15190. <https://doi.org/10.1038/nplants.2015.190>
- Reed, J.W., Nagatani, A., Elich, T.D., Fagan, M., Chory, J., 1994. Phytochrome A and Phytochrome B Have Overlapping but Distinct Functions in Arabidopsis Development. *Plant Physiol.* 104, 1139. <https://doi.org/10.1104/pp.104.4.1139>
- Reed, J.W., Nagpal, P., Poole, D.S., Furuya, M., Chory, J., 1993. Mutations in the gene for the red/far-red light receptor phytochrome B alter cell elongation and physiological responses throughout Arabidopsis development. *Plant Cell* 5, 147. <https://doi.org/10.1105/tpc.5.2.147>
- Robinson, M.D., McCarthy, D.J., Smyth, G.K., 2009. edgeR: a Bioconductor package for differential expression analysis of digital gene expression data. *Bioinformatics* 26, 139–140. <https://doi.org/10.1093/bioinformatics/btp616>
- Rolauffs, S., Fackendahl, P., Sahm, J., Fiene, G., Hoecker, U., 2012. Arabidopsis COP1 and SPA Genes Are Essential for Plant Elongation But Not for Acceleration of Flowering Time in Response to a Low Red Light to Far-Red Light Ratio. *Plant Physiol.* 160, 2015–2027. <https://doi.org/10.1104/pp.112.207233>
- Saijo, Y., Sullivan, J.A., Wang, H., Yang, J., Shen, Y., Rubio, V., Ma, L., Hoecker, U., Deng, X.W., 2003. The COP1–SPA1 interaction defines a critical step in phytochrome A-mediated regulation of HY5 activity. *Genes Dev.* 17, 2642–2647. <https://doi.org/10.1101/gad.1122903>
- Salisbury, F.J., Hall, A., Grierson, C.S., Halliday, K.J., 2007. Phytochrome coordinates Arabidopsis shoot and root development. *Plant J.* 50, 429–438. <https://doi.org/10.1111/j.1365-313X.2007.03059.x>

- Sassi, M., Lu, Y., Zhang, Y., Wang, J., Dhonukshe, P., Bliilou, I., Dai, M., Li, J., Gong, X., Jaillais, Y., Yu, X., Traas, J., Ruberti, I., Wang, H., Scheres, B., Vernoux, T., Xu, J., 2012. COP1 mediates the coordination of root and shoot growth by light through modulation of PIN1- and PIN2-dependent auxin transport in Arabidopsis. *Development* 139, 3402. <https://doi.org/10.1242/dev.078212>
- Shiple, B., Meziane, D., 2002. The balanced-growth hypothesis and the allometry of leaf and root biomass allocation. *Funct. Ecol.* 16, 326–331. <https://doi.org/10.1046/j.1365-2435.2002.00626.x>
- Slovak, R., Göschl, C., Su, X., Shimotani, K., Shiina, T., Busch, W., 2014. A Scalable Open-Source Pipeline for Large-Scale Root Phenotyping of Arabidopsis. *Plant Cell* 26, 2390. <https://doi.org/10.1105/tpc.114.124032>
- Sun, J., Qi, L., Li, Y., Chu, J., Li, C., 2012. PIF4-Mediated Activation of YUCCA8 Expression Integrates Temperature into the Auxin Pathway in Regulating Arabidopsis Hypocotyl Growth. *PLoS Genet.* 8, e1002594. <https://doi.org/10.1371/journal.pgen.1002594>
- Thornley, J.H.M., 1972. A Balanced Quantitative Model for Root: Shoot Ratios in Vegetative Plants. *Ann. Bot.* 36, 431–441. <https://doi.org/10.1093/oxfordjournals.aob.a084602>
- Tian, T., Liu, Y., Yan, H., You, Q., Yi, X., Du, Z., Xu, W., Su, Z., 2017. agriGO v2.0: a GO analysis toolkit for the agricultural community, 2017 update. *Nucleic Acids Res.* 45, W122–W129. <https://doi.org/10.1093/nar/gkx382>
- Toledo-Ortiz, G., Johansson, H., Lee, K.P., Bou-Torrent, J., Stewart, K., Steel, G., Rodríguez-Concepción, M., Halliday, K.J., 2014. The HY5-PIF Regulatory Module Coordinates Light and Temperature Control of Photosynthetic Gene Transcription. *PLOS Genet.* 10, 1–14. <https://doi.org/10.1371/journal.pgen.1004416>
- Van Gelderen, K., Kang, C., Paalman, R., Keuskamp, D., Hayes, S., Pierik, R., 2018. Far-Red Light Detection in the Shoot Regulates Lateral Root Development through the HY5 Transcription Factor. *Plant Cell* 30, 101. <https://doi.org/10.1105/tpc.17.00771>
- Vijaybhaskar, V., Subbiah, V., Kaur, J., Vijayakumari, P., Siddiqi, I., 2008. Identification of a root-specific glycosyltransferase from Arabidopsis and characterization of its promoter. *J. Biosci.* 33, 185–193. <https://doi.org/10.1007/s12038-008-0036-5>
- Wang, R., Zhang, Y., Kieffer, M., Yu, H., Kepinski, S., Estelle, M., 2016. HSP90 regulates temperature-dependent seedling growth in Arabidopsis by stabilizing the auxin co-receptor F-box protein TIR1. *Nat. Commun.* 7, 10269. <https://doi.org/10.1038/ncomms10269>
- Xiong, Y., McCormack, M., Li, L., Hall, Q., Xiang, C., Sheen, J., 2013. Glucose-TOR signalling reprograms the transcriptome and activates meristems. *Nature* 496, 181.
- Xu, T., Dai, N., Chen, J., Nagawa, S., Cao, M., Li, H., Zhou, Z., Chen, X., De Rycke, R., Rakusová, H., Wang, W., Jones, A.M., Friml, J., Patterson, S.E., Bleecker, A.B., Yang, Z., 2014. Cell Surface ABP1-TMK Auxin-Sensing Complex Activates ROP GTPase Signaling. *Science* 343, 1025. <https://doi.org/10.1126/science.1245125>
- Yanagawa, Y., Sullivan, J.A., Komatsu, S., Gusmaroli, G., Suzuki, G., Yin, J., Ishibashi, T., Saijo, Y., Rubio, V., Kimura, S., Wang, J., Deng, X.W., 2004. Arabidopsis COP10 forms a complex with DDB1 and DET1 in vivo and enhances the activity of ubiquitin conjugating enzymes. *Genes Dev.* 18, 2172–2181. <https://doi.org/10.1101/gad.1229504>
- Zheng, X., Wu, S., Zhai, H., Zhou, P., Song, M., Su, L., Xi, Y., Li, Z., Cai, Y., Meng, F., Yang, L., Wang, H., Yang, J., 2013. Arabidopsis Phytochrome B Promotes SPA1 Nuclear Accumulation to Repress Photomorphogenesis under Far-Red Light. *Plant Cell* 25, 115. <https://doi.org/10.1105/tpc.112.1070>

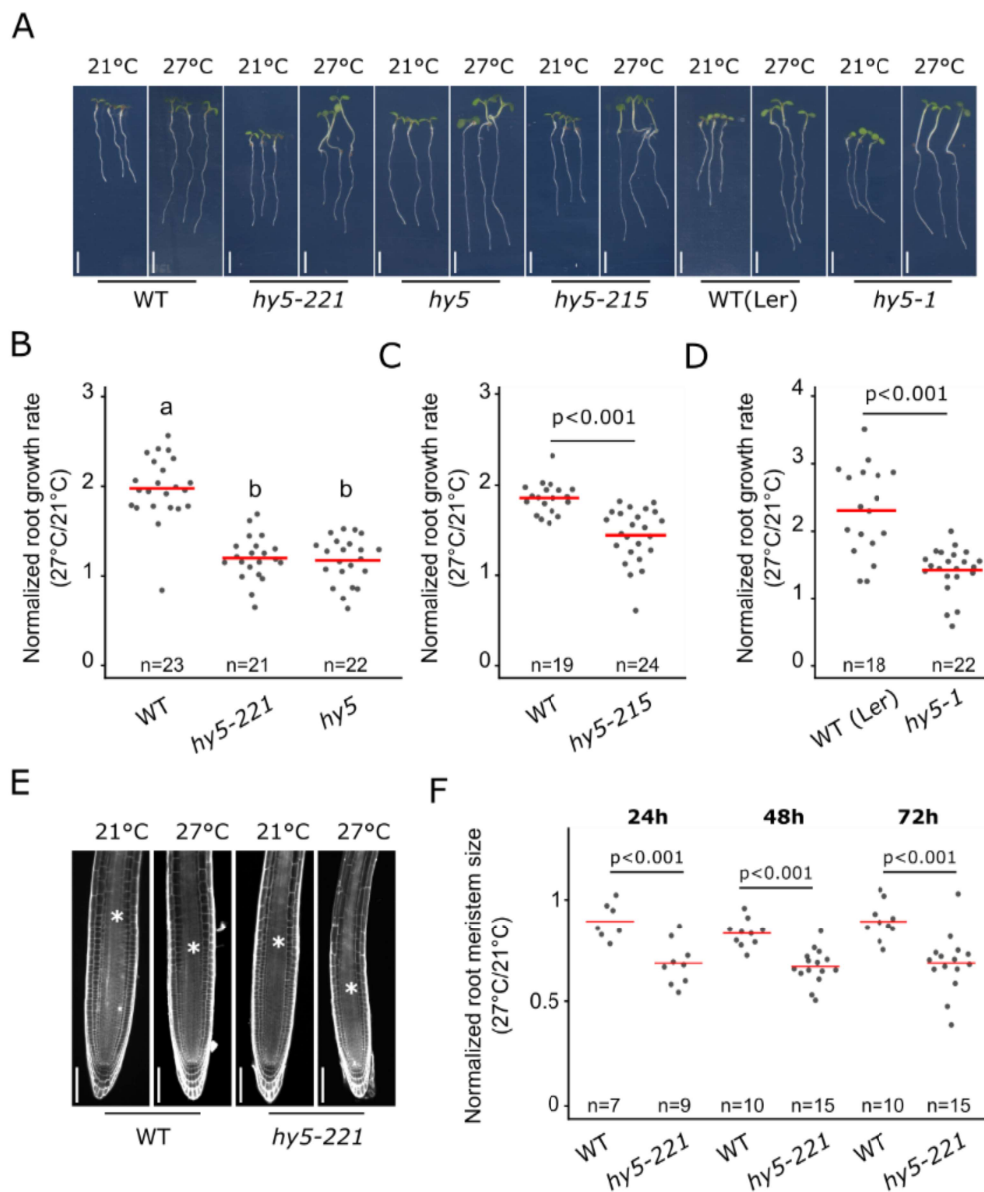

Figure 1: HY5 mediates the root response to higher ambient temperature

(A) Wild type and *hy5* allelic mutant seedling plants 6DAG and 3 days after transfer at 21°C or 27°C. (B-D), Normalized root growth rate (27°C/21°C) in wild type, *hy5*, *hy5-221*, *hy5-1* and *hy5-215*. (E) Root meristem in wild type and *hy5-221* 5DAG and 2 days after transfer at 21°C or 27°C. Asterisks mark the root transition zone. (F) Normalized root meristem size (27°C/21°C) in wild type and *hy5-22* at 24, 48 and 72 hours after temperature shift. Statistics: One-way ANOVA, Tukey HSD post-hoc test P<0.05 (A). Student's t-test (C,D,F). Red bar represents the mean (B,C,D,F). Scale bar: 5mm (A), 100µm (E).

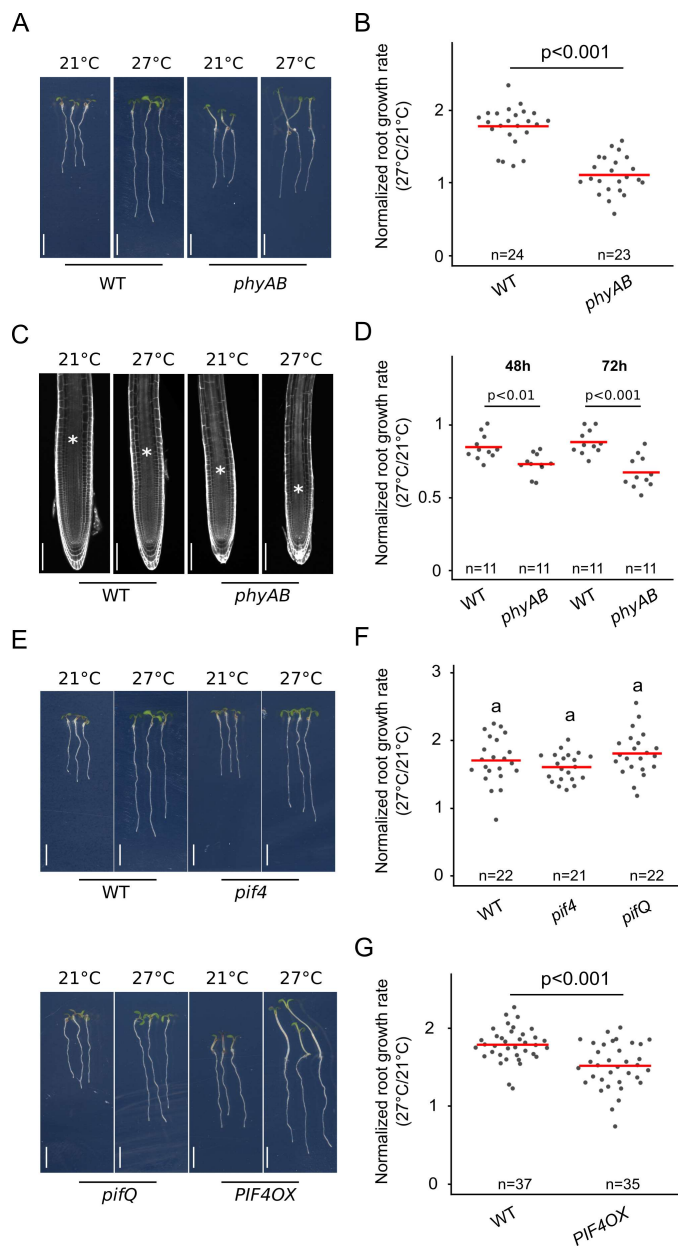

Figure 2: Phytochrome signaling regulates the root response to higher ambient temperature

(A) Wild type (WT) and *phyAB* mutant seedlings 6DAG and 3 days after transfer at 21°C or 27°C. (B) Normalized root growth rate (27°C/21°C) in wild type and *phyAB*. (C) Root meristem in wild type and *phyAB*, 5DAG 2 days after transfer at 21°C or 27°C. Asterisk marks the root transition zone. (D) Normalized root meristem size (27°C/21°C) in wild type and *phyAB*, 48 and 72 hours after temperature shift. (E) Wild type, *pif4*, *pifQ* and PIF4 OX mutant seedlings 6DAG and 3 days after transfer at 21°C or 27°C. (F-G) Normalized root growth rate (27°C/21°C) in wild type, *pif4*, *pifQ* (F) and PIF4 OX (G). Statistics: One-way ANOVA, Tukey HSD post-hoc test  $P < 0.05$  (F). Student t-test (B,D,G). Red bar represents the mean (B,D,F,G). Scale bar: 5mm (A,E), 100 $\mu$ m (C).

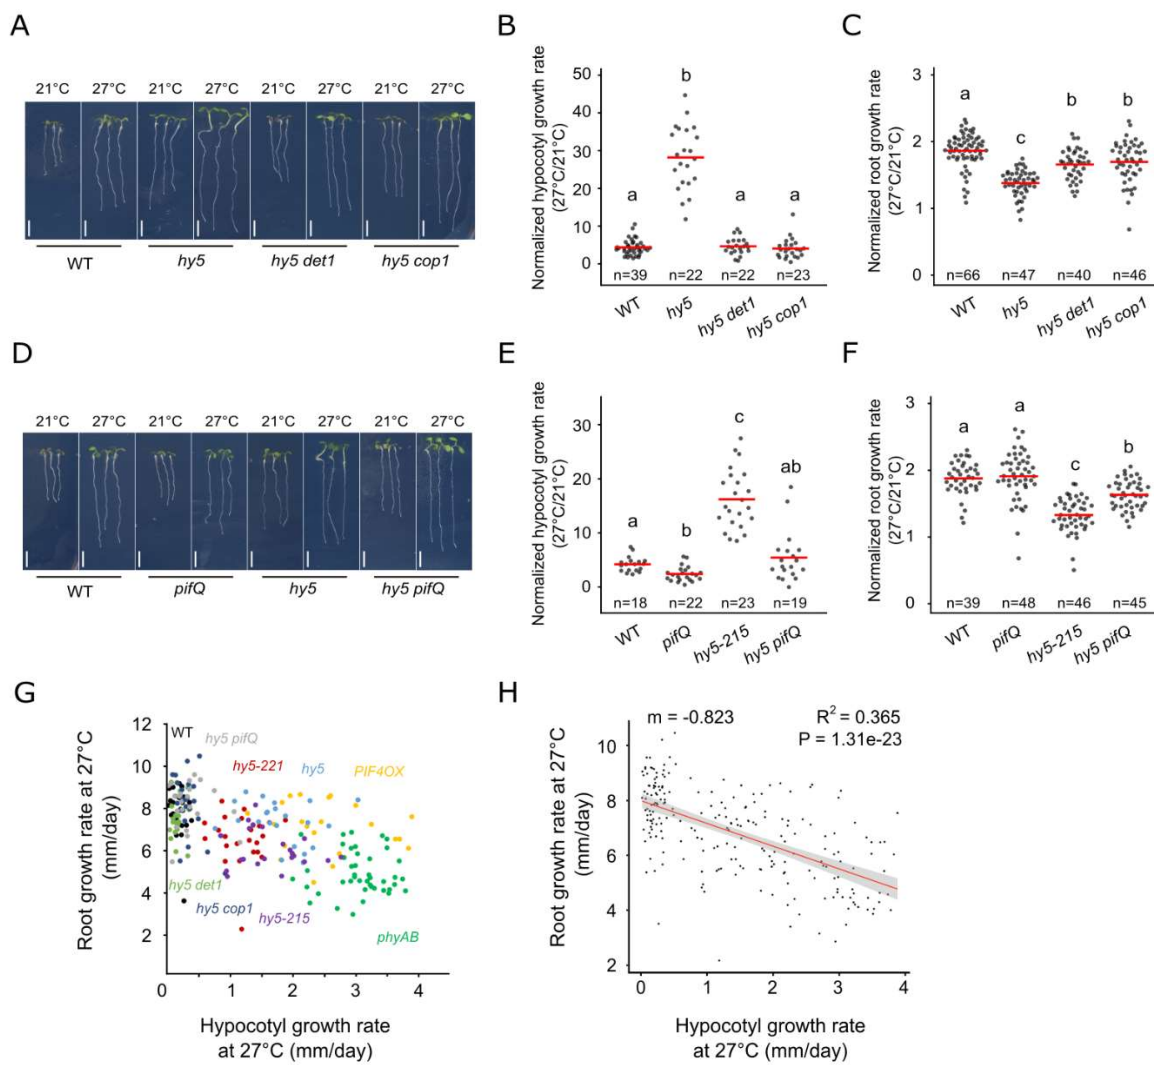

Figure 3: HY5-PIF module regulates the root response to temperature.

(A) Wild type, *hy5*, *hy5 det1* and *hy5 cop1* mutant seedlings 6DAG and 3 days after transfer at 21°C or 27°C. (B-C) Normalized hypocotyl (B) and root growth rate (C) (27°C/21°C) in wild type, *hy5*, *hy5 det1* and *hy5 cop1*. (D) Wild type, *pifQ*, *hy5* and *hy5 pifQ* mutant seedlings 6DAG and 3 days after transfer at 21°C or 27°C. (E-F) Normalized hypocotyl (E) and root growth rate (F) (27°C/21°C) in wild type, *pifQ*, *hy5-215* and *hy5 pifQ*. (G-H) Relation between root and hypocotyl growth rate at 27°C as shown with measurements on individual wild type (n=23), *hy5-221* (n=24), *phyAB* (n=43), PIF4OX (n=22), *hy5* (n=22), *hy5 det1* (n=20), *hy5 cop1* (n=22), *hy5-215* (n=23), *hy5 pifQ* (n=22) plants (G) and after non-parametric regression analysis (H). Statistics: One-way ANOVA, Tukey HSD post-hoc test  $P < 0.05$  (C,F). One way ANOVA after log10 transformation (B,E), linear regression method, Pearson correlation (H). Red bar represents the mean (B,C,E,F). Scale bar: 5mm (A,D).

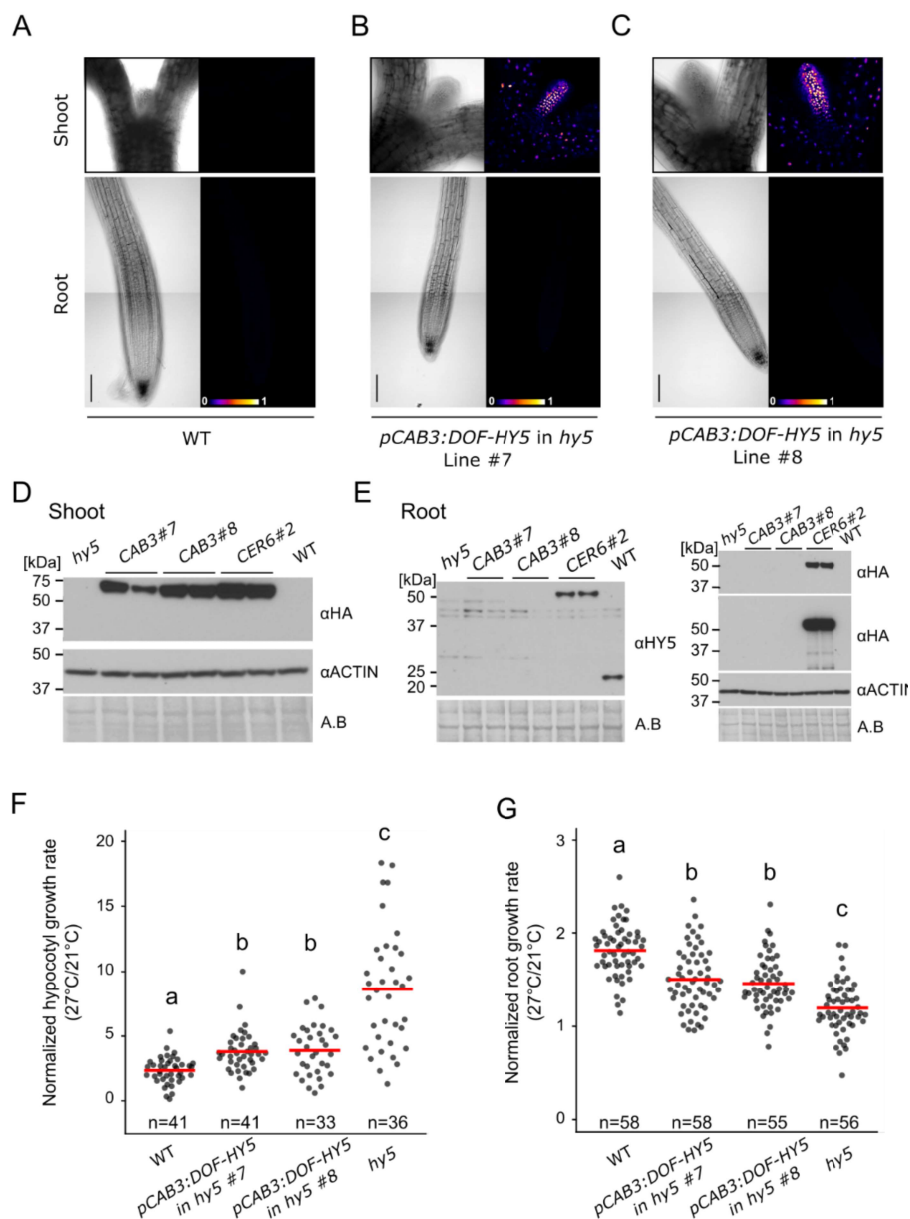

Figure 4: Shoot response to temperature is sufficient to modulate root growth response

(A-C) Brightfield or false color view of wild type seedlings 6DAG (A) and two independent lines of *hy5* carrying *pCAB3:DOF-HY5* (B,C). (D-E) Immunoblotting of shoot (D) or root tissues (E) in wild type (WT), *hy5*, two independent lines of *hy5* carrying *pCAB3:DOF-HY5*, *hy5* carrying *pCER6:DOF-HY5* and *pCAB3:DOF-HY5* lines at 27°C. DOF-HY5 protein was detected using HA or HY5 antibodies. Amido black staining and actin antibody were used as controls. (F) Normalized hypocotyl growth rate (27°C/21°C) in wild type, *hy5* and *pCAB3:DOF-HY5* rescue lines. (G) Normalized root growth rate (27°C/21°C) in wild

type, *hy5* and *pCAB3:DOF-HY5* rescue lines. Statistics. One-way ANOVA, Tukey HSD post-hoc test  $P < 0.05$  (F,G). Red bar represents the mean (F,G). Scale bar: 100 $\mu$ m (A-C).

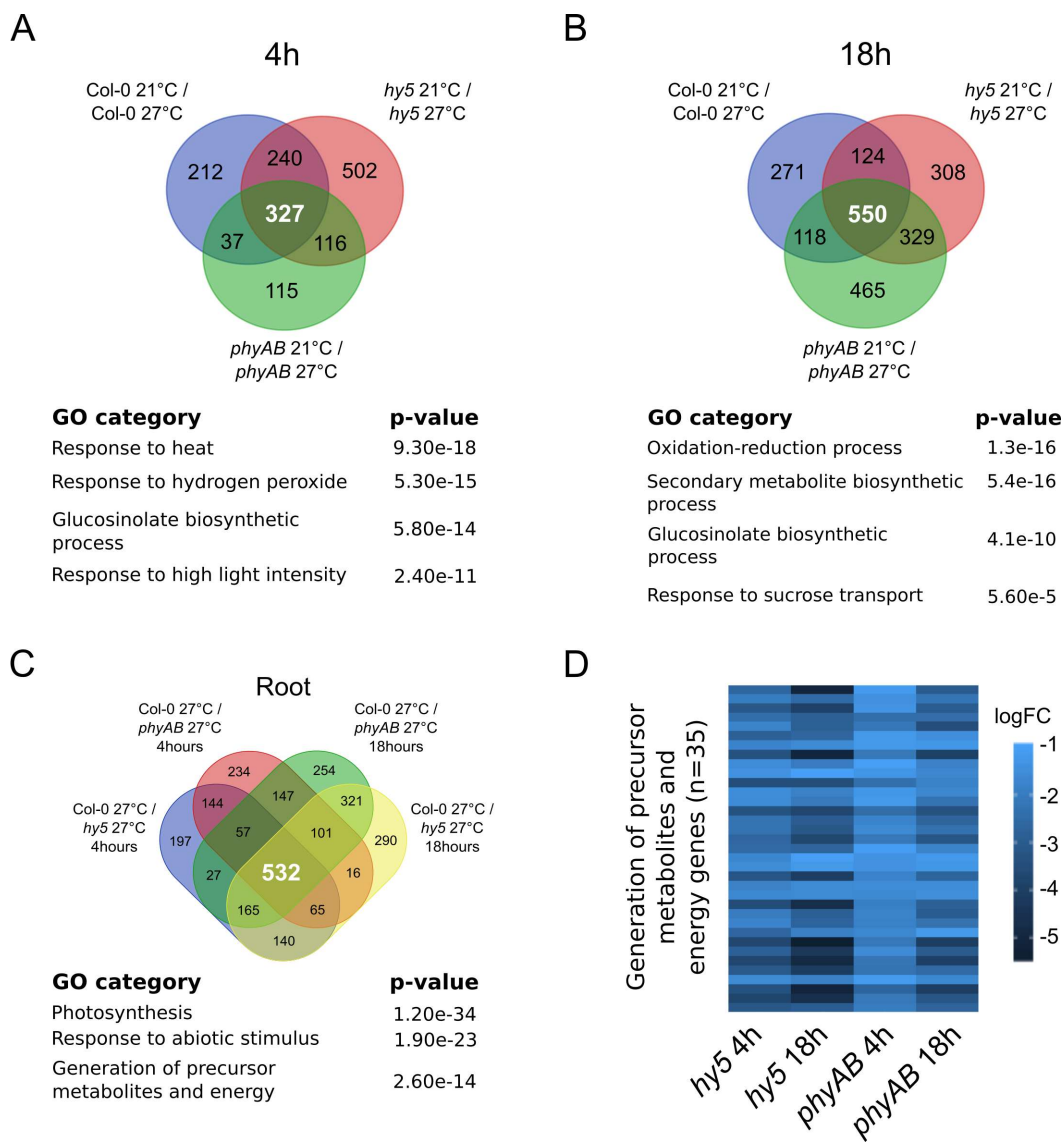

Figure 5: Genome-wide analysis of root response to temperature.

(A-B) Genes regulated 4 hours (A) or 18 hours (B) after temperature shift in wild type, *hy5* and *phyAB* roots. Gene ontologies (GO) characterize the biological processes enriched among the temperature-regulated genes that are shared between wild type, *hy5* and *phyAB*. (C) Overlapping misregulated genes in *hy5* and *phyAB* roots at 27°C. (D) Differentially regulated genes belonging to the GO category “Generation of precursor metabolites and energy genes” in *hy5* and *phyAB* roots at 27°C. Statistics: p-value as calculated with AgrigoV2 (A-C).

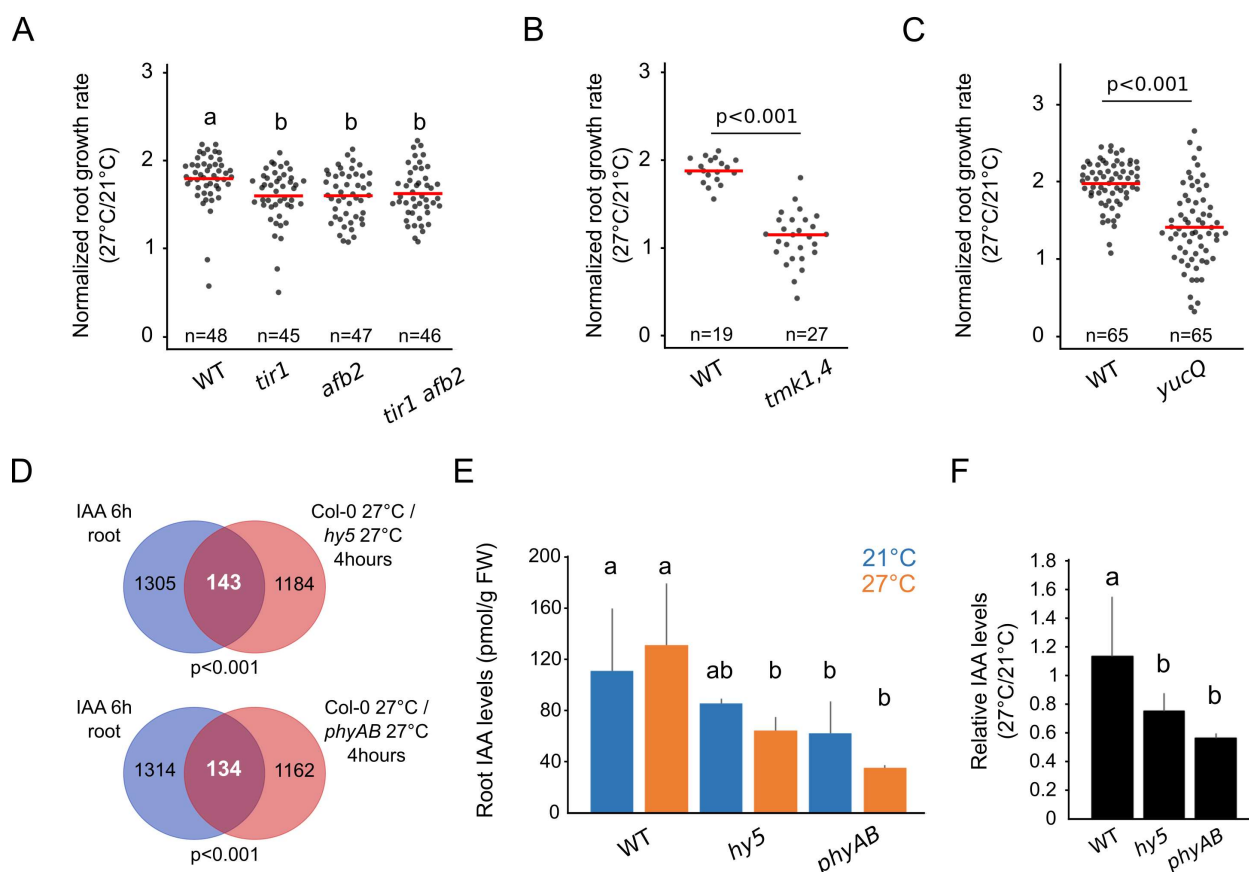

Figure 6: Auxin homeostasis regulates root thermomorphogenesis

(A-C) Normalized root growth rate (27°C/21°C) in wild type, *tir1*, *afb2*, *tir1 afb2* (A), *tmk1,4* (B), *yucQ* (C). (D) Differentially regulated genes in *hy5* and *phyAB* roots at 27°C that are auxin responsive according to (Omelyanchuk et al., 2017), 18 hours after temperature shift. (E) IAA concentration (pmol / g of fresh weight (FW)) in roots of seedlings 6DAG, 12 hours after transfer at 21°C or 27°C ( $n > 3$ ). (F) Relative IAA content in root compared to shoot tissues of seedlings 6DAG, 12 hours after transfer at 21°C or 27°C ( $n > 3$ ). Statistics: One-way ANOVA, Tukey HSD post-hoc test  $p < 0.05$  (B,D). Student's t-test (A,C). hypergeometric test (D). One-way ANOVA, Student-Newmann Keuls's post hoc test  $p < 0.05$  (E,F). Red bar represents the mean (A-C).



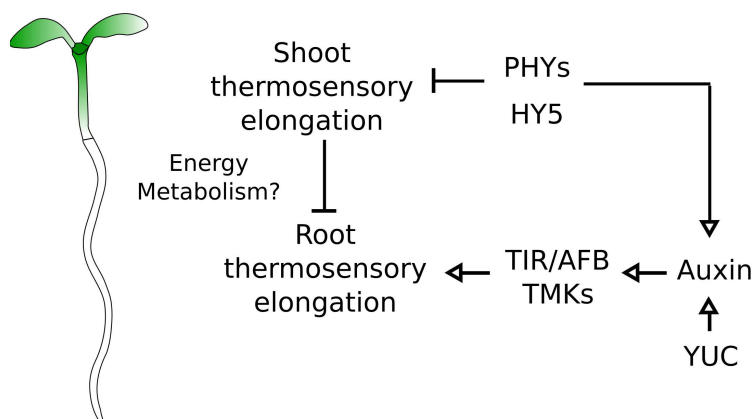

Figure 7: A genetic model for organ growth coordination during plant thermomorphogenesis

Model of root thermosensory response. Roots integrate regulatory signals coming from the shoot through the activity of phytochromes and HY5 with auxin signals mediated by biosynthetic genes (YUC) and signaling (TIR, AFB, TMK).

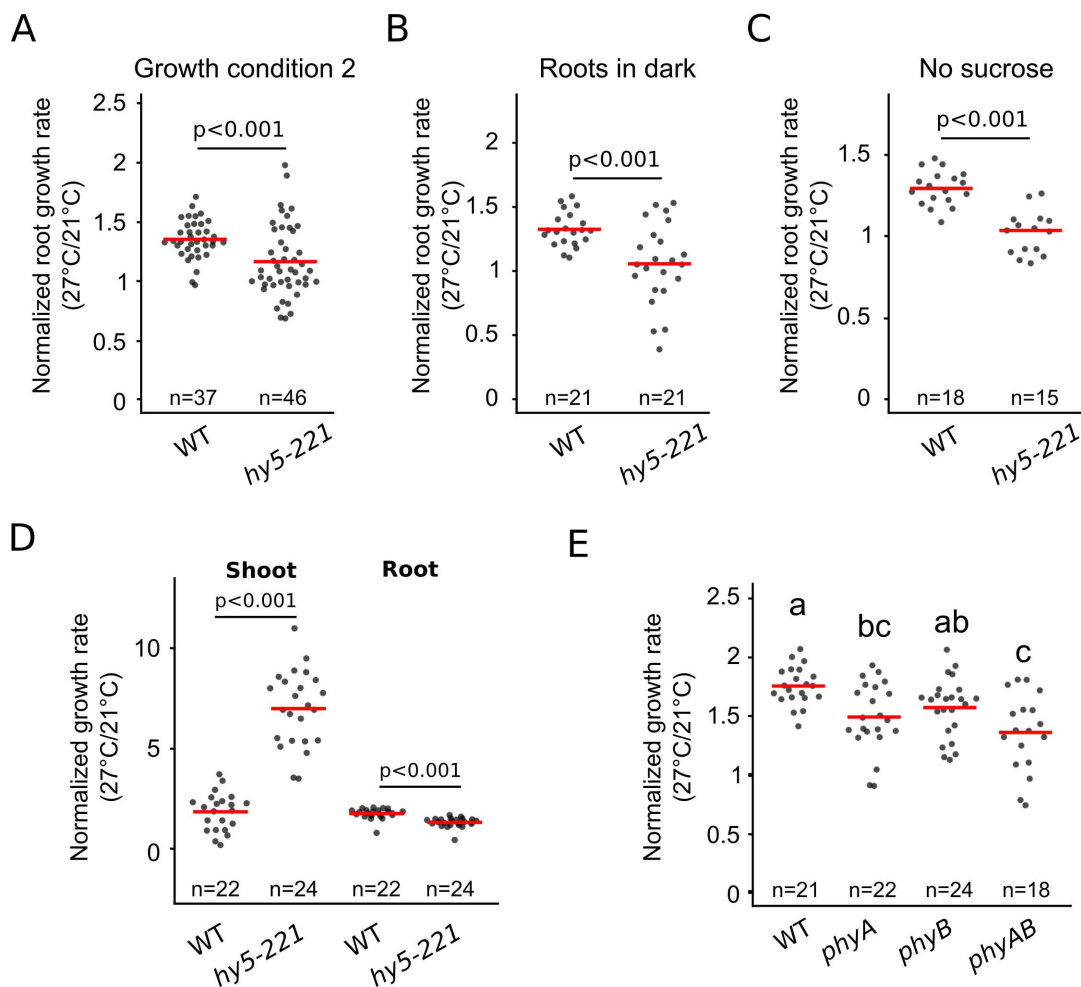

Supplementary Figure 1: Characterization of *hy5* in response to higher ambient temperature

(A-C) Normalized root growth rate (27°C/21°C) in wild type and *hy5-221* under growth condition 2 (A) (see method section) or with roots grown in the dark (B) or with roots grown on medium not supplemented with sucrose (C). (D) Normalized hypocotyl and root growth rate (27°C/21°C) simultaneously measured on individual plants. (E) Normalized root growth rate (27°C/21°C) in wild type, *phyA*, *phyB* and *phyAB*. Statistics: Student's t-test (A-D), one-way ANOVA, Tukey HSD post-hoc test P < 0.05 (E). Red bar represents the mean (A-E)

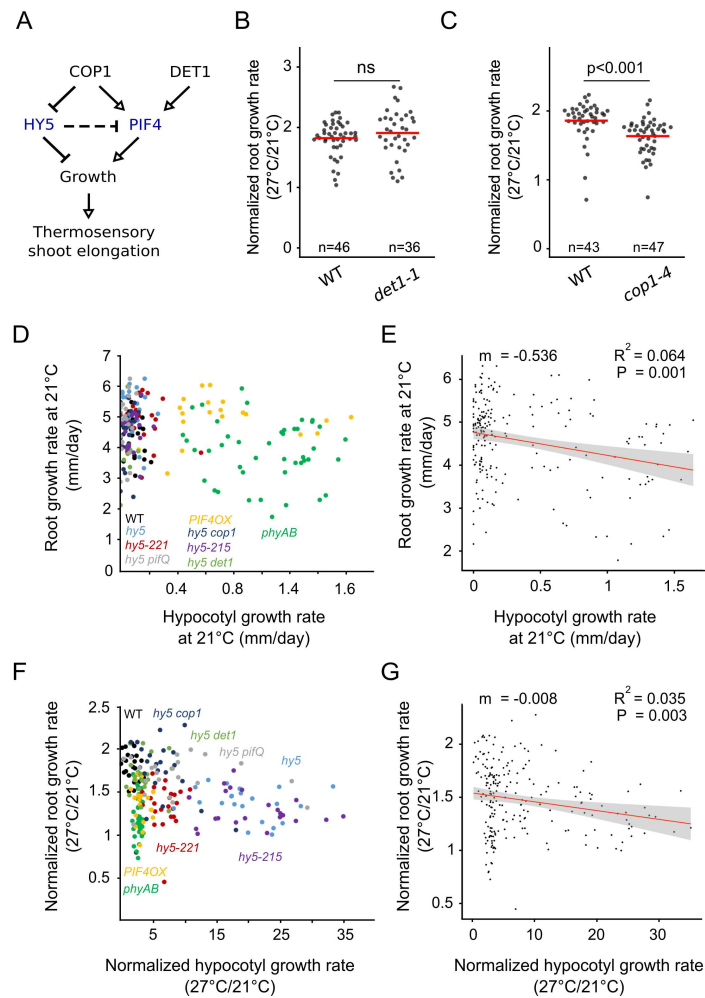

Supplementary Figure 2: Characterization of the HY5-PIF module in response to higher ambient temperature

(A) Regulatory model of thermosensory shoot elongation as proposed by (Delker et al., 2014). (B-C) Normalized root growth rate (27°C/21°C) in wild type, *det1-1* (B) and *cop1-4* (C). (D-E) Relation between root and hypocotyl growth rate at 21°C as shown with measurements on individual wild type (n=20), *hy5-221* (n=19), *phyAB* (n=44), PIF4OX (n=20), *hy5* (n=22), *hy5 det1* (n=19), *hy5 cop1* (n=22), *hy5-215* (n=23), *hy5 pifQ* (n=20) plants (D) and after non-parametric regression analysis (E). (F-G) Relation between normalized root and hypocotyl growth rate (27°C/21°C) as shown with measurements on individual wild type (n=23), *hy5-221* (n=24), *phyAB* (n=43), PIF4OX (n=22), *hy5* (n=22), *hy5 det1* (n=20), *hy5 cop1* (n=22), *hy5-215* (n=23), *hy5 pifQ* (n=22) plants (F) and after non-parametric regression analysis (G) Statistics: Student's t-test (B,C), linear regression method, Pearson correlation (E,G). Red bar represents the mean (B,C).

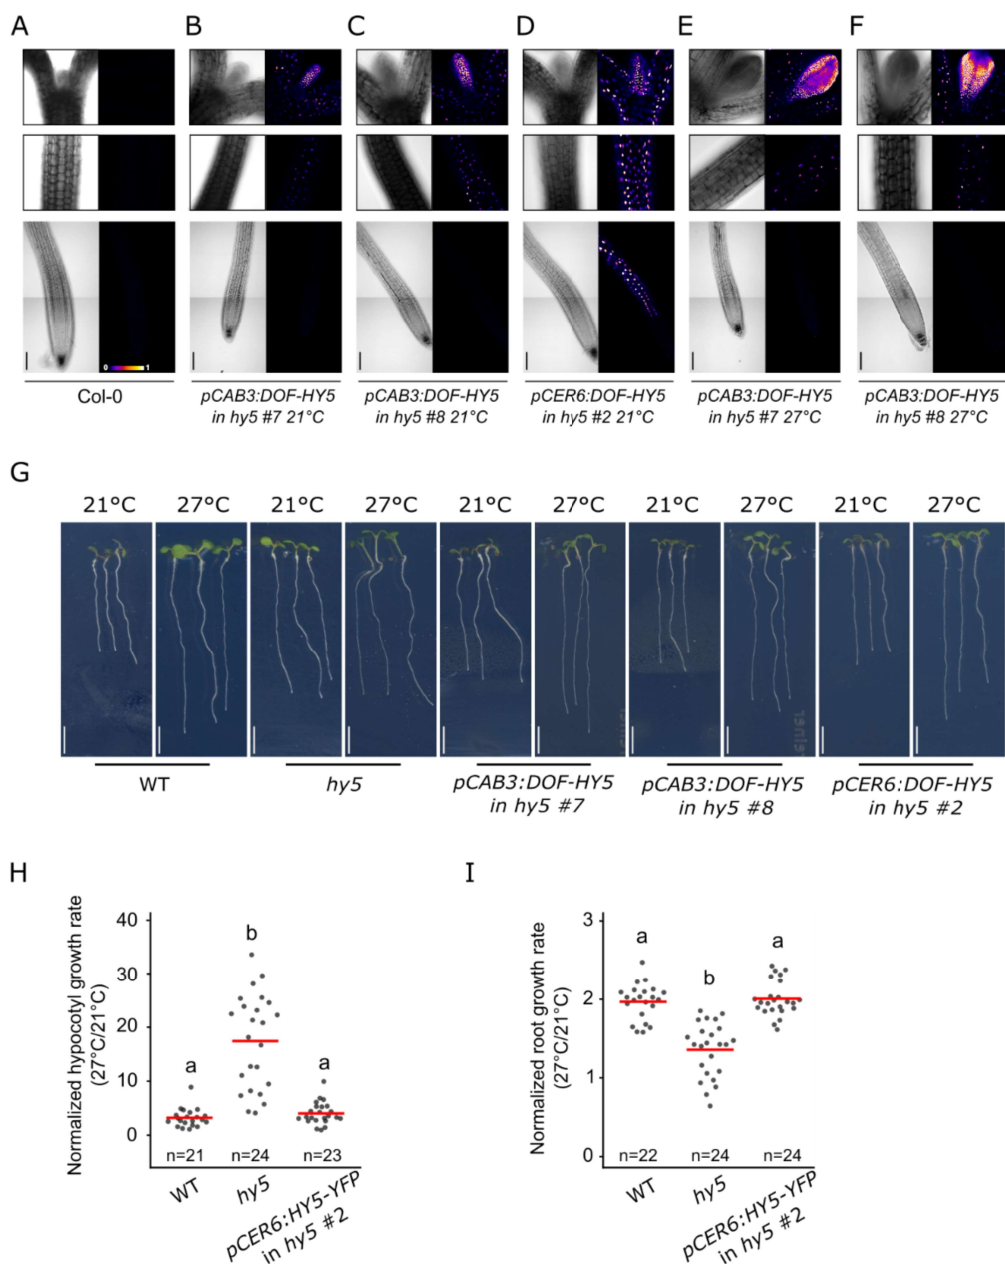

Supplementary Figure 3: Characterization of HY5 chimera lines

(A-F) Brightfield or false color view of seedlings roots, hypocotyls and apical ends 6DAG in Col-0 (A), two independent lines of *hy5* carrying *pCAB3:DOF-HY5* (B,C), *hy5* carrying *pCER6:DOF-HY5* (D) and *pCAB3:DOF-HY5* lines at 27°C (E,F). (G) Wild type, *hy5*, two independent lines of *hy5* carrying *pCAB3:DOF-HY5*, *hy5* carrying *pCER6:DOF-HY5* seedlings 6DAG and 3 days after transfer at 21°C or 27°C. (H-I) Normalized hypocotyl (H) and root growth rate (I) (27°C/21°C) in wild type, *hy5* and *hy5* carrying *pCER6:DOF-HY5*. Statistics: One-way ANOVA, Tukey HSD post-hoc test  $p < 0.05$  (H,I). Red bar represents the mean (H,I). Scale bar: 5mm (G), 100 $\mu$ m (A-F).

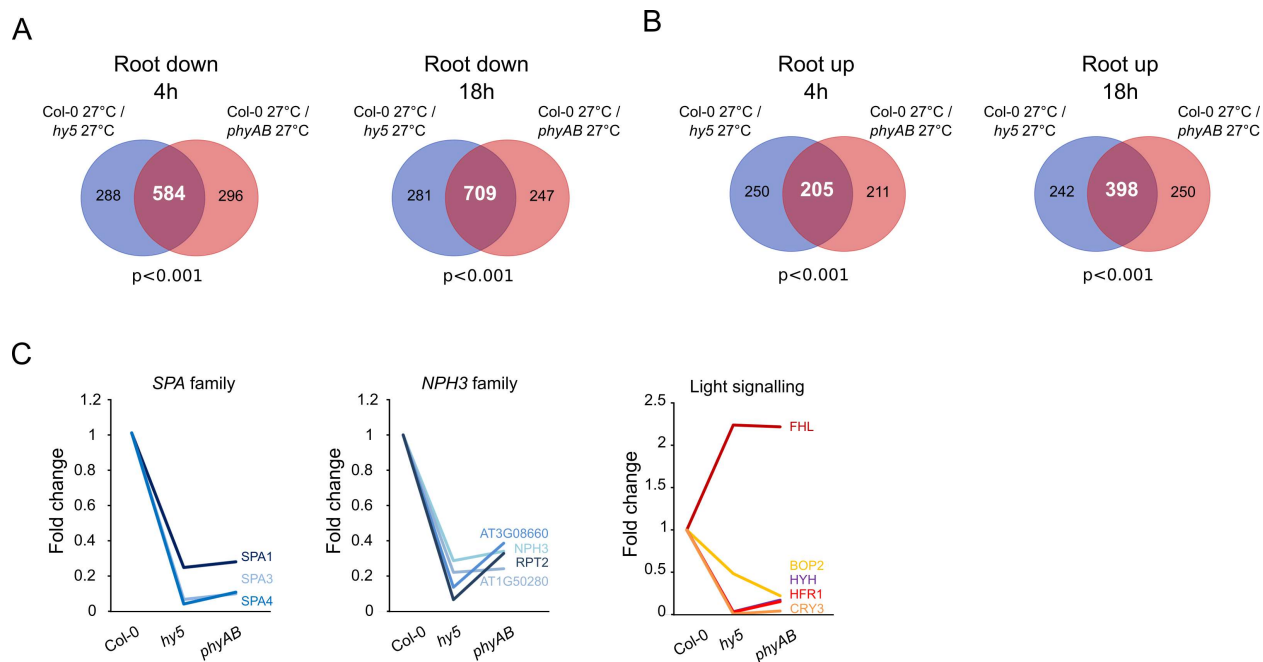

Supplementary Figure 4: Transcriptional profiling of *hy5* and *phyAB* mutants

(A-B) Commonly downregulated (A) or upregulated (B) genes in *hy5* and *phyAB* roots at 27°C, 4 or 18 hours after temperature shift. (C) Root expression change of genes co-regulated by HY5 and phytochromes. . Statistics: hypergeometric test (A,B)

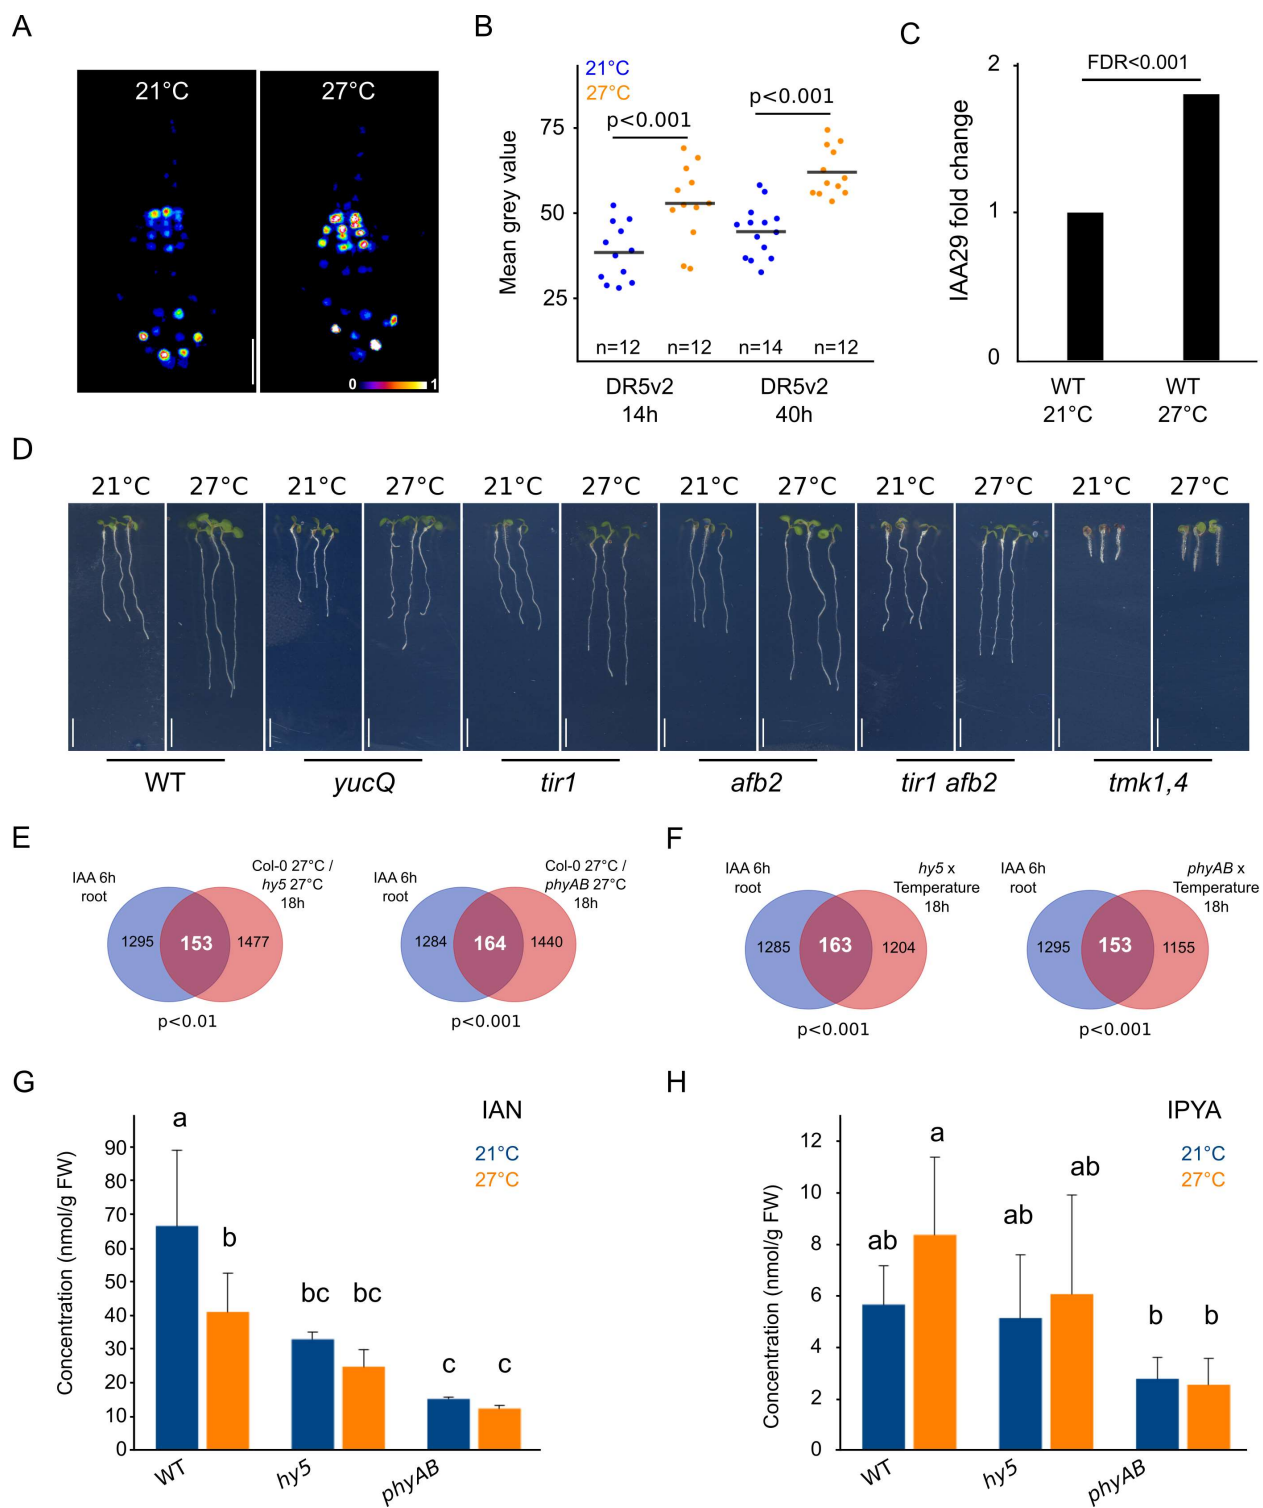

### Supplementary Figure 5: Auxin homeostasis during root thermomorphogenesis

(A) False color view of root tips expressing *pDR5v2:3xYFP-NLS* grown at 21°C or 27°C. (B) Quantification of DR5v2 signal in seedlings 14 hours or 40 hours after transfer at 21°C or 27°C. (C) Relative IAA29 expression detected in wild type roots 4 hours after transfer at 21°C or 27°C. (D) Wild type, *yucQ*, *tir1*, *afb2*, *tir1 afb2* and *tmk1,4* mutant seedlings 6DAG and 3 days after transfer at 21°C or 27°C. (E) Differentially regulated genes in *hy5* and *phyAB* roots at 27°C, 18 hours after temperature shift that are auxin responsive (Omelyanchuk et al., 2017). (F) Overlap between genes whose transcriptional response changes in *hy5* or *phyAB* and that are auxin responsive. (G-H) Indole-3-acetonitrile (G) and indole-3-pyruvic acid (H) concentration in 6DAG wild type, *hy5-221* and *phyAB* roots 12 hours after transfer at 27°C. Statistics: Student t-test (B), false discovery rate (FDR) as calculated by EdgeR (C), hypergeometric test (E-F), one-way ANOVA, Student-Newmann Keuls's post hoc test  $p < 0.05$  (G-H). Scale bar: 5mm (D). Black bar represents the mean (B).

## Supplementary data root measurements.

Statistics: One-way ANOVA, Tukey HSD post-hoc test  $p < 0.05$

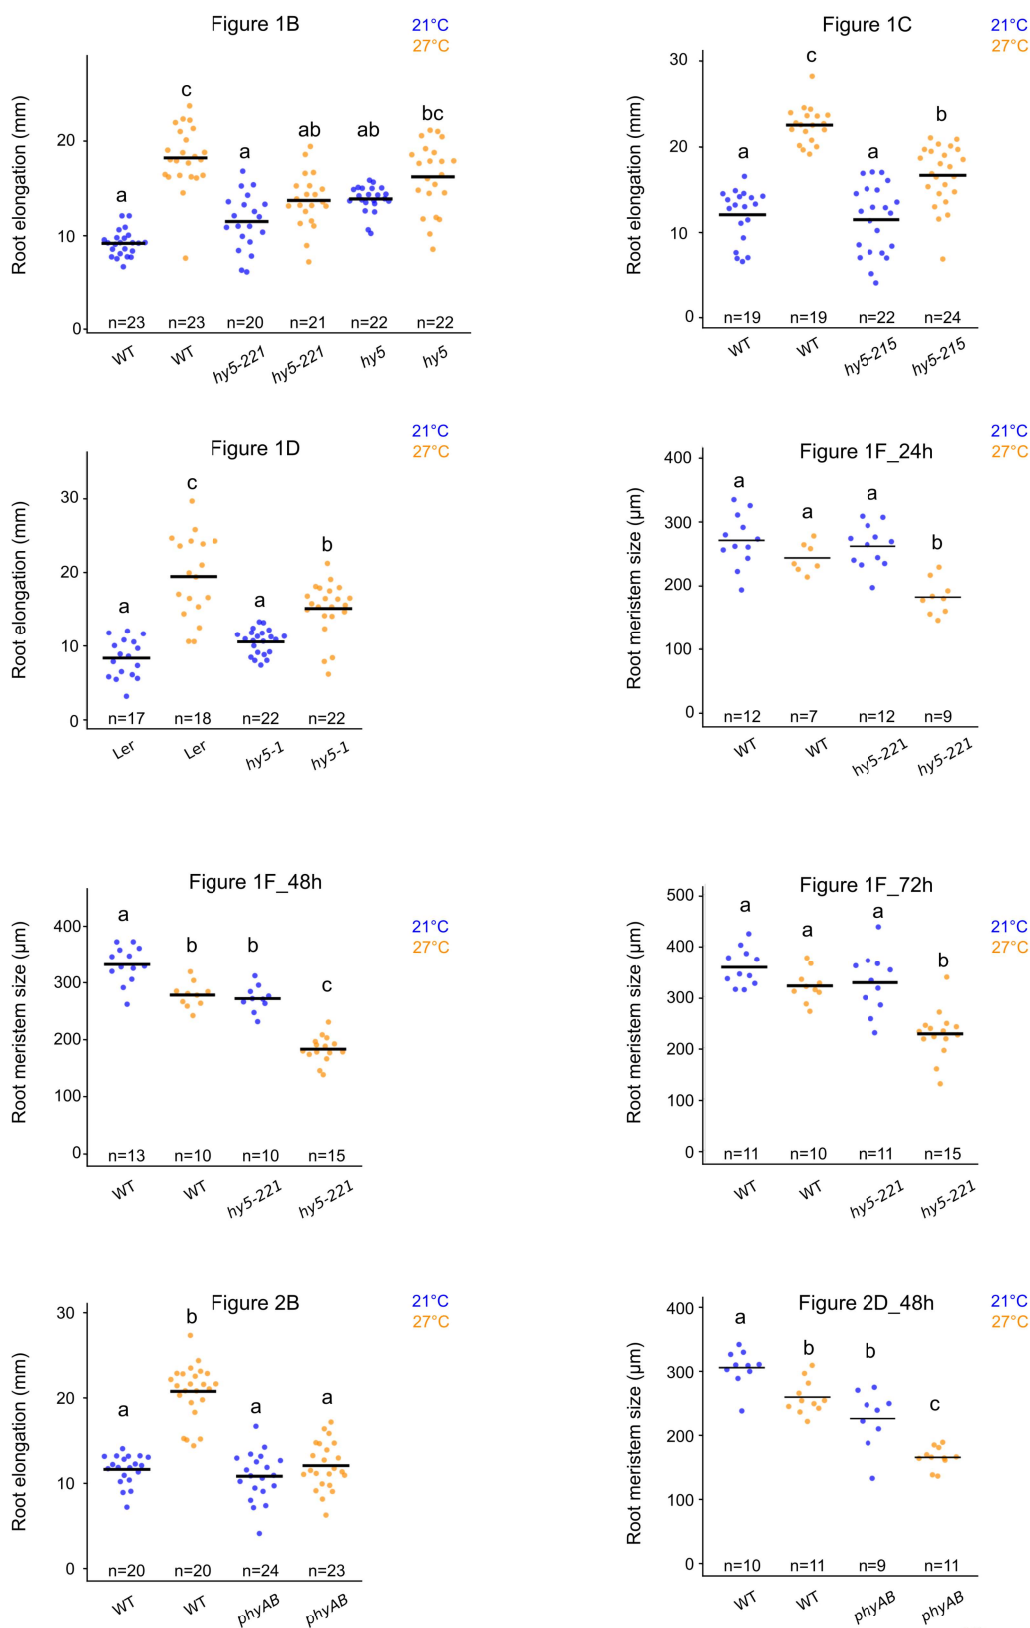



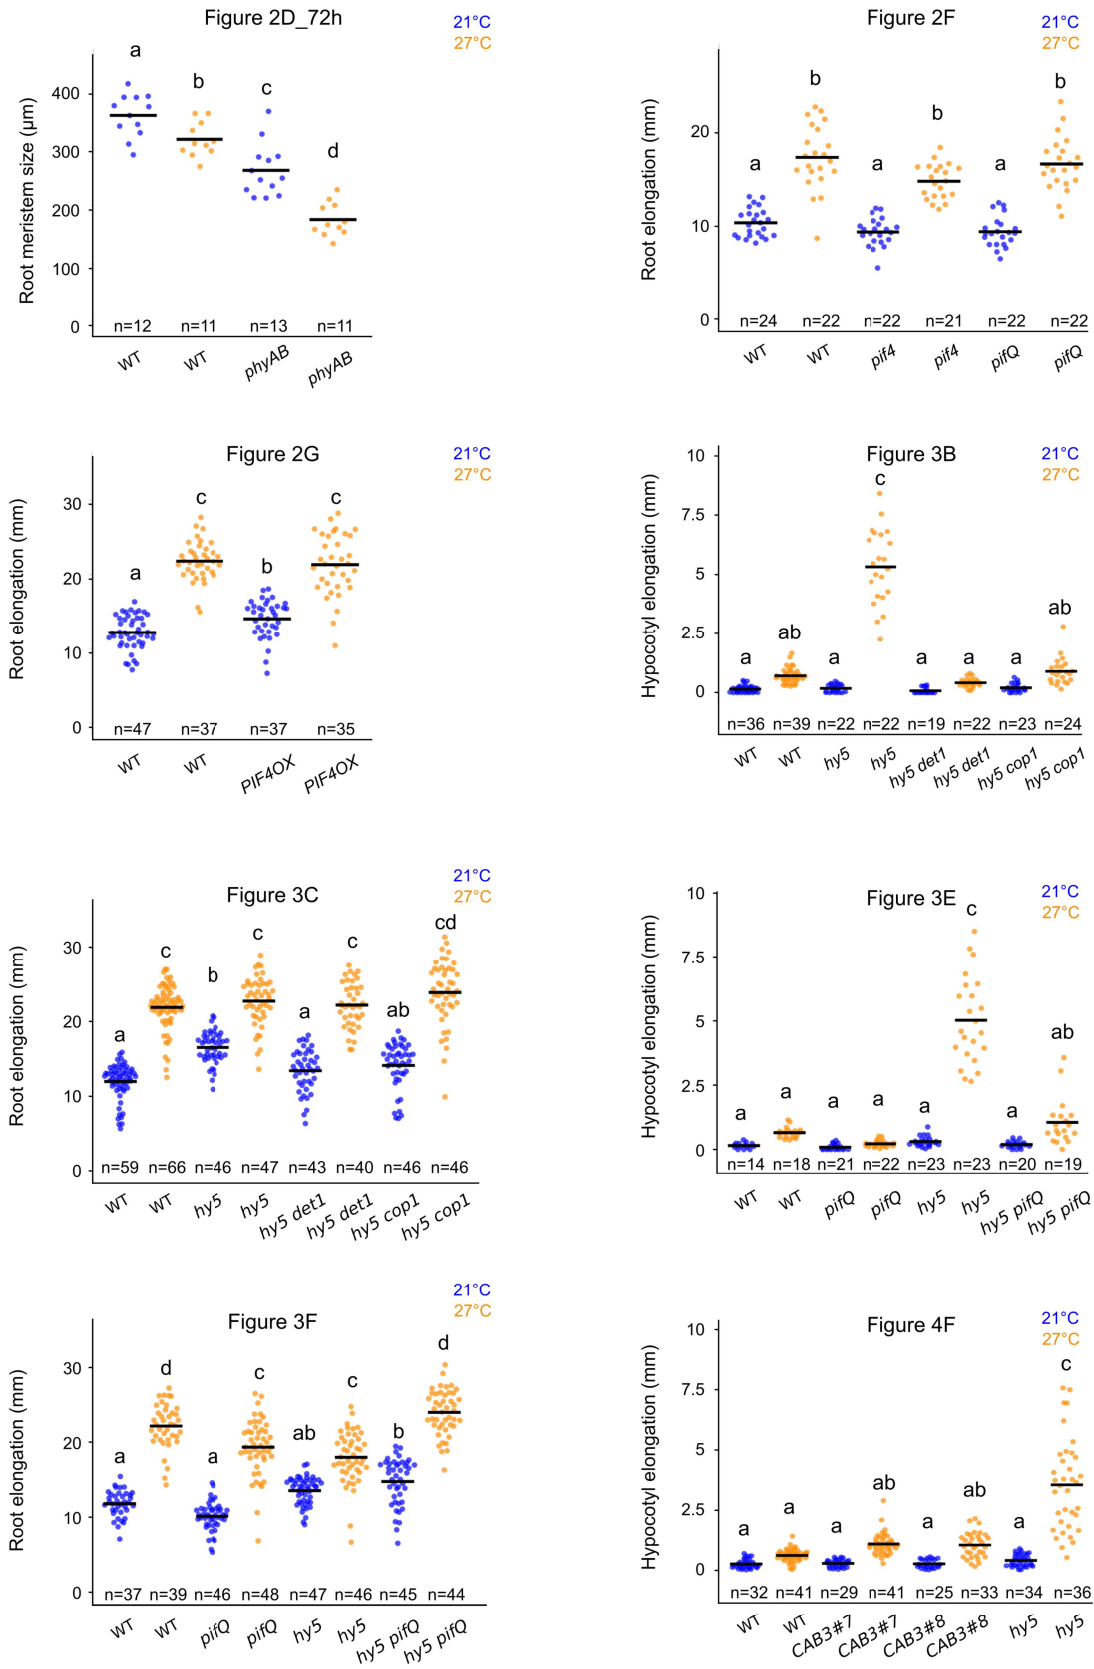

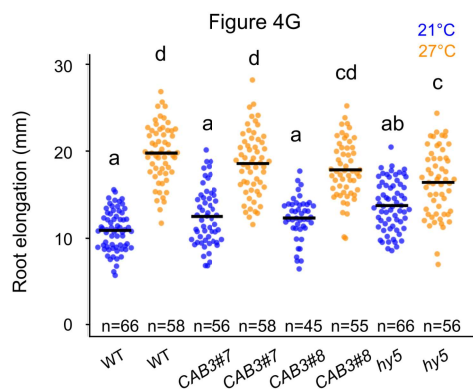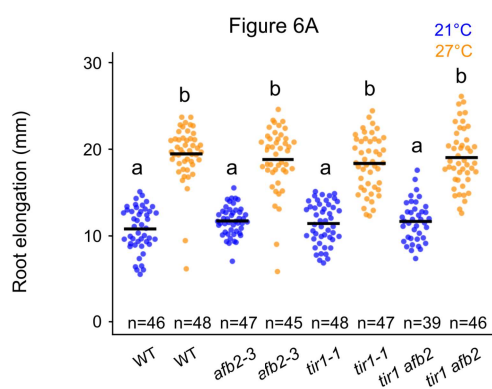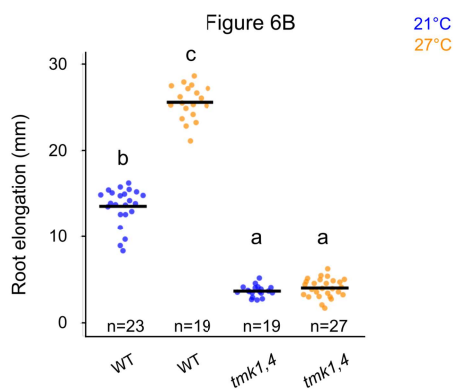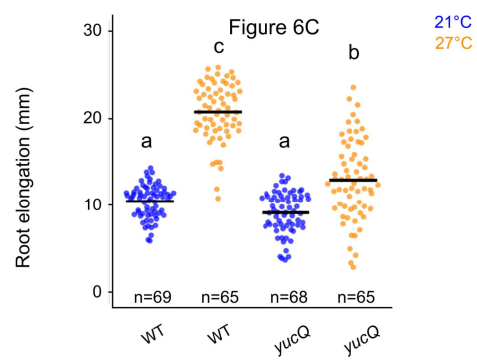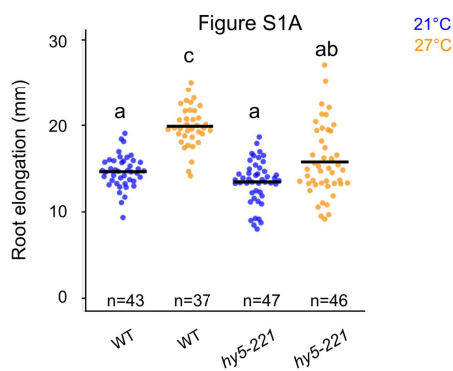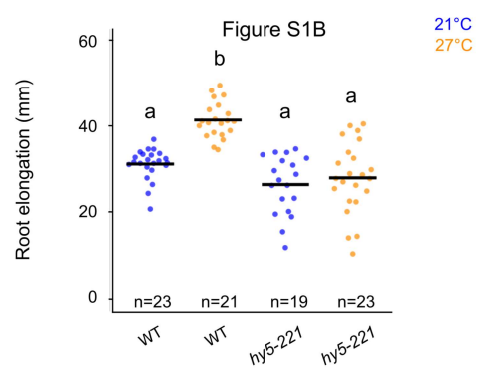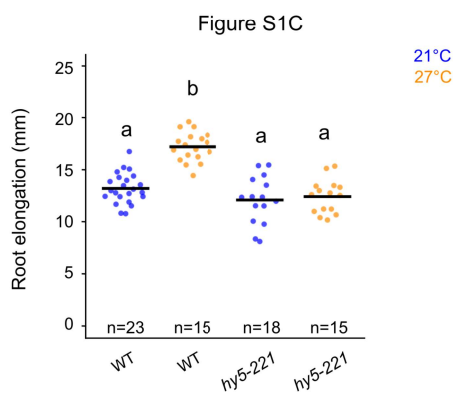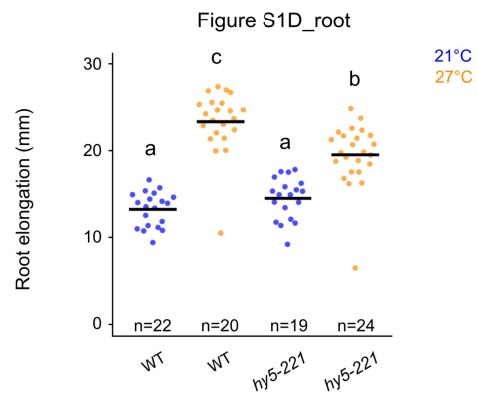

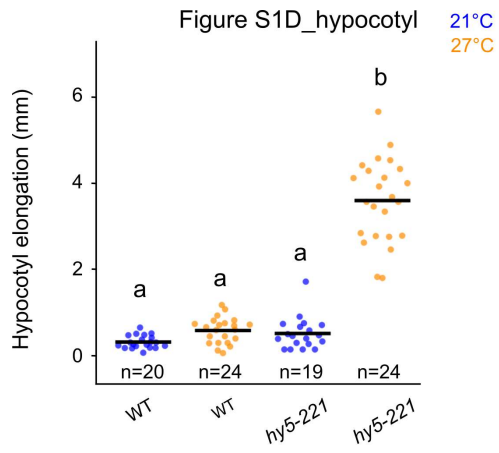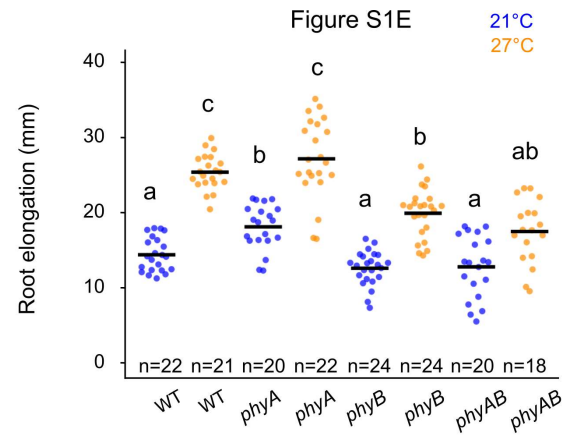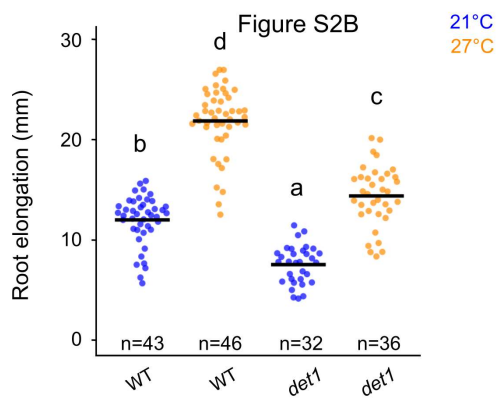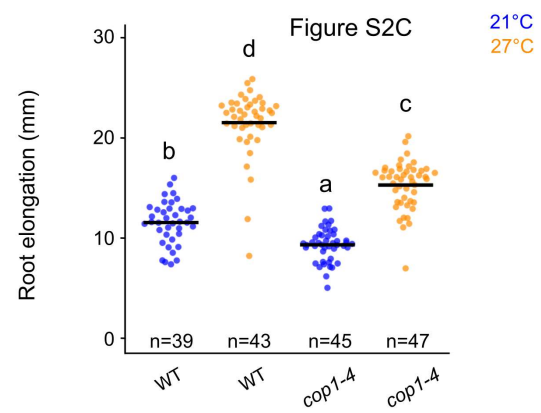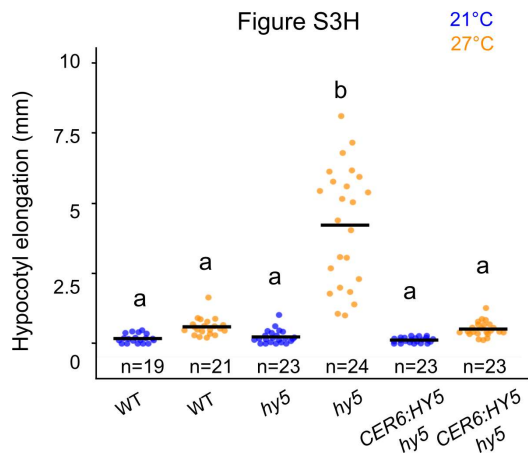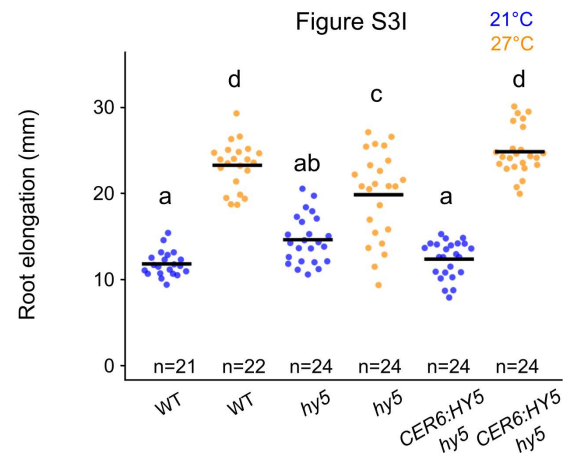

Source: https://www.biorxiv.org/content/10.1101/2020.05.07.083246v2.full.pdf
